# Sex-Dependent Expression of Caveolin 1 in Response to Sex Steroid Hormones Is Closely Associated with Development of Obesity in Rats

Rajib Mukherjee<sup>1</sup>, Sang Woo Kim<sup>1</sup>, Myung Sook Choi<sup>2</sup>, Jong Won Yun<sup>1\*</sup>

**1** Department of Biotechnology, Daegu University, Kyongsan, Republic of Korea, **2** Center for Food and Nutritional Genomics Research & Department of Food Science and Nutrition, Kyungpook National University, Daegu, Republic of Korea

## Abstract

Caveolin-1 (CAV1) is a conserved group of structural membrane proteins that form special cholesterol and sphingolipid-rich compartments, especially in adipocytes. Recently, it has been reported that CAV1 is an important target protein in sex hormone-dependent regulation of various metabolic pathways, particularly in cancer and diabetes. To clarify distinct roles of CAV1 in sex-dependent obesity development, we investigated the effects of high fat diet (HFD) and sex steroid hormones on CAV1 expression in adipose tissues of male and female rats. Results of animal experiments revealed that estrogen (17- $\beta$ -estradiol, E2) and androgen (dihydrotestosterone, DHT) had opposite effects on body weight gain as well as on the regulation of CAV1, hormone sensitive lipase (HSL) and uncoupling protein 1 (UCP1) in adipose tissues. Furthermore, sex hormone receptors and aromatase were differentially expressed in a sex-dependent manner in response to E2 and DHT treatments. *In vivo* data were confirmed using 3T3-L1 and HIB1B cell lines, where *Cav1* knock down stimulated lipogenesis but suppressed sex hormone receptor signaling proteins. Most importantly, co-immunoprecipitation enabled the identification of previously unrecognized CAV1-interacting mitochondrial or lipid oxidative pathway proteins in adipose tissues. Taken together, current data showed that CAV1 may play important preventive role in the development of obesity, with more prominent effects in females, and proved to be an important target protein for the hormonal regulation of adipose tissue metabolism by manipulating sex hormone receptors and mitochondrial oxidative pathways. Therefore, we can report, for the first time, the molecular mechanism underlying the effects of sex steroid hormones in the sex-dimorphic regulation of CAV1.

**Citation:** Mukherjee R, Kim SW, Choi MS, Yun JW (2014) Sex-Dependent Expression of Caveolin 1 in Response to Sex Steroid Hormones Is Closely Associated with Development of Obesity in Rats. PLoS ONE 9(3): e90918. doi:10.1371/journal.pone.0090918

**Editor:** Julie A. Chowen, Hospital Infantil Universitario Niño Jesús, CIBEROBN, Spain

**Received:** November 4, 2013; **Accepted:** February 6, 2014; **Published:** March 7, 2014

**Copyright:** © 2014 Mukherjee et al. This is an open-access article distributed under the terms of the Creative Commons Attribution License, which permits unrestricted use, distribution, and reproduction in any medium, provided the original author and source are credited.

**Funding:** This work was supported by the Mid-career Researcher Program (2013R1A2A2A05004195) and SRC Program (Center for Food & Nutritional Genomics: grant number 2008-0062157) through NRF grant funded by the Ministry of Science, ICT and Future Planning, Korea. The funders had no role in study design, data collection and analysis, decision to publish, or preparation of the manuscript.

**Competing Interests:** The authors have declared that no competing interests exist.

\* E-mail: jwyun@daegu.ac.kr

## Introduction

Recently, interest in factors that regulate adipose tissue function has increased due to concerns over excess fat consumption in Western diets, which may mainly contribute to obesity and other metabolic diseases [1]. In adipose tissues, caveolin proteins are abundantly expressed and play roles in vesicular transport, cholesterol homeostasis, and signal transduction [2]. Several lines of evidence have indicated that caveolins may be implicated in the pathogenesis of various diseases, including cancer, diabetes, atherosclerosis, heart failure, muscular dystrophy, and Alzheimer's disease [2–5]. Caveolin-1 (CAV1) is the most important member of the caveolin family, which is a conserved group of structural membrane proteins that form special cholesterol and sphingolipid-rich compartments, especially in adipocytes and endothelial cells in which caveolae constitutes 20–30% of the total plasma membrane [6–8].

Previous studies using *Cav1*-null mice have demonstrated reduced whole body fat mass and adiponectin levels, elevated triglycerides (TG) and free fatty acids (FFA), as well as blunted responses to  $\beta_3$ -adrenergic receptor stimulation [2,4]. Unfortu-

nately, previous reports on the response of CAV1 expression to different physiological conditions are contradictory. For example, Razani and Lisanti [4] reported reduced lipid accumulation in *Cav1* knockout (KO) mice along with a lean phenotype. Cohen et al. [9] demonstrated reduced lipolytic capacity in *Cav1* KO mice, and Fernandez-Real et al. [10] showed attenuated *Cav1* expression in visceral and subcutaneous white adipose tissue (WAT) of obese patients. Moreover, a recent report demonstrated that loss of *Cav1* alters mitochondrial function in adipose tissues [7]. The reduction of adipose tissue in *Cav1*-null mice can be attributed to altered lipid deposition and improper storage of lipids outside of the adipose tissue [11]. The lean phenotype of *Cav1*-null mice is primarily related to the inability of adipose tissue to store lipids, which consequently remain in the circulation and cause massive elevation of free fatty acids and hypertriglycerides [11,12]. Despite this recent progress, the precise roles of CAV1 remain unclear, especially in the development of obesity. Furthermore, it is not well established whether or not CAV1 exerts its effects in a sex-dependent manner as well as in response to sex steroid hormones.

In our previous studies, we found that male rats are more susceptible to obesity when fed a HFD, and many proteins play roles in obesity resistance in different metabolic tissues [13–16]. In conjunction with the present data, an earlier report demonstrated the anti-obesity effects of CAV1, as evidenced by reduced *Cav1* expression in visceral adipose tissue of obese patients [10]. Therefore, these data led us to hypothesize that CAV1 may play a protective role in diet-induced obesity, which strongly contradicts the lean phenotype observed in *Cav1*-deficient animal models reported by other investigators [7,8,17].

Sex steroid hormones and their receptors are well-known regulators of several aspects of metabolism, such as lipid and carbohydrate metabolism, and their impaired signaling is highly associated with the development of metabolic diseases [18–24]. In particular, estrogens has been shown to reduce the body weight of HFD-fed mice [25], reduce hepatic lipogenesis, improve insulin sensitivity [26], as well as promote the partitioning of free fatty acids toward oxidation [27].

In our previous studies, we found that numerous metabolic proteins in white adipose tissue (WAT), brown adipose tissue (BAT), and other metabolic tissues are regulated in a sex-dependent manner [28–32]. We believe that the different expression patterns of those proteins are the result of differential hormonal regulation, specifically estrogens and testosterone.

Previous evidence has demonstrated that CAV1 regulates sex hormone signaling by directly interacting with hormone receptors in the membrane, and hormones have been shown to modulate CAV1 expression in several types of cells [12,33–35]. A variety of studies have raised the possibility that estrogens have more prominent effects than testosterone in diabetes and cancer [35]. Moreover, conflicting results have been obtained regarding the role of testosterone in diabetes [19,36,37]. Recently, Oh et al. [35] reported an increase in CAV1 expression in skeletal muscle cells upon 17- $\beta$ -estradiol (E2) treatment, whereas dihydrotestosterone (DHT) had no effect.

A wealth of information exists concerning the functional aspects of CAV1, including its active site for downstream signaling molecules as well as roles in lipid transport, TG transport, and nutrient storage [38–40]. Recently, it has been reported that CAV1 is an important target protein in E2- as well as DHT-dependent regulation of various metabolic pathways, particularly in cancer and diabetes [33,35,41,42].

Previously, we observed increased expression of CAV1 in adipose tissues of obesity-resistant SD male rats fed a HFD [43]. In this sense, we can hypothesize that diet affects the expression of CAV1 in a sex and site-specific manner. Moreover, we also postulate that CAV1 may serve as an important player affecting sex dimorphism in the development of obesity and other metabolic diseases.

To date, no report is available concerning the sex-dimorphic regulation of CAV1 in response to diet and/or sex hormone treatment. Therefore, the main objective of this study was to elucidate the molecular mechanism underlying the effects of sex steroid hormones on sex-dimorphic regulation of CAV1, which is a potent target protein in the treatment of lipodystrophy and other complications resulting from altered hormonal regulation of adipocyte metabolism. To this end, we applied the major physiological sex hormones E2 and DHT *in vivo* (Sprague-Dawley rats) as well as *in vitro* (3T3-L1 and HIB1B cell lines) to elucidate whether or not both sex hormones actually regulate CAV1 expression levels in various adipose tissues. In addition, CAV1 knockdown (KD) using a siRNA transfection system was performed to determine the effects of CAV1 on metabolic as well as sex hormone receptor candidates in both adipocyte cells. Lastly,

using co-immunoprecipitation, we identified previously unrecognized CAV1-interacting partner proteins in adipose tissues, including members of mitochondrial or lipid pathways.

## Materials and Methods

### Ethics Statement

All animal experiments were approved by the Committee for Laboratory Animal Care and Use of Daegu University. All procedures were conducted in accordance with the Guide for the Care and Use of Laboratory Animals published by the National Institutes of Health.

### Animals, Diets, and Hormone Treatments

Five-week-old Sprague-Dawley (SD) rats were purchased from Daehan Experimental Animals (Seoul, Korea) and maintained under control conditions: temperature ( $23 \pm 2^\circ\text{C}$ ), humidity (55%) in a controlled room, normal chow and tap water, and a 12 h light/12 h dark cycle for 1 week for acclimatization. We treated SD rats with 17- $\beta$ -estradiol (E2) and dihydrotestosterone (DHT) without ovariectomy (OVX) or orchietomy (ORX) in order to verify the effects of external sex hormones without the adjacent physiological consequences of OVX or ORX. To eradicate the initial difference in endogenous sex hormone concentration between the groups, we measured plasma sex hormone concentrations before starting the animal experiment. At the beginning of the experiment, animals having at least 2 times higher or lower hormone levels compared to the rest of the animals were excluded. Average sex hormone values were as follows; E2 concentration in males was 0.33 pg/ml, E2 concentration in females was 0.34 pg/ml and DHT concentration in males was 1.87 ng/ml, DHT concentration in females was 1.77 ng/ml. Remaining rats with similar sex hormone concentrations were grouped randomly into six rats/group. Later, male and female rats were divided into six groups each containing six rats selected randomly, resulting in total 12 groups viz; male and female controls fed a normal diet (ND CON), E2-treated males and females fed a normal diet (ND E2), DHT-treated males and females fed a normal diet (ND DHT), male and female controls fed a high fat diet (HFD CON), E2-treated males and females fed a high fat diet (HFD E2), and DHT-treated males and females fed a high fat diet (HFD DHT). All animals were fed either ND or HFD with or without either E2 (Sigma, St. Louis, MO) or DHT (Sigma) treatment. Sex hormones were first dissolved in ethanol and diluted in 0.15 M NaCl solution and then injected intraperitoneally to a final concentration of 750  $\mu\text{g}$  of sex hormone/kg of body weight or the same volume of vehicle for 48 days at 3 day intervals. ND and HFD contained 12% and 45% fat as an energy source (Korea Lab., Hanam, Korea), and the dietary composition was the same as that used in our previous study [29]. All rats and food were weighed every week for 6 weeks. All animals were fasted for 10–12 hrs (overnight) and were sacrificed using cervical dislocation.

### Blood Samples and Plasma Biochemical Characterization

Blood samples were collected by puncturing the tail vein or abdominal aorta and collected into EDTA-tubes (BD, Franklin Lakes, NJ, USA). Plasma was separated by centrifugation ( $3,000 \times g$ , 10 min), followed by storage at  $-80^\circ\text{C}$  until further analysis. Common plasma biochemical characterizations were performed using a commercial ELISA kit for plasma TG, FFA (Biovision Inc. Milpitas, CA, USA), E2 (Cayman Chemical Company, Ann Arbor, MI, USA), and DHT (Bioassay Technology Laboratory, Shanghai, Yangpu, China). All ELISA experi-

ments were carried out in triplicate using individual plasma samples.

### Collection of Tissues and Protein Sample Preparation

Three different rat WATs (inguinal, abdominal, and gonadal WATs) interscapular BAT, liver and S Muscle were collected immediately after sacrifice, weighed, washed in saline water, and pulverized in liquid nitrogen, followed by final storage in  $-80^{\circ}\text{C}$ . From each WAT and BAT sample, one small portion was stored in 4% *p*-formaldehyde for histological study. Tissue lysates were prepared with RIPA buffer (Sigma-Aldrich), homogenized, and centrifuged at  $12,000\times g$  for 20 min. For immunoblot analysis, protein samples were prepared from six individual tissue samples of each group, followed by quantification and pooling of six protein samples to make a single sample from each group.

### Immunoblot Analysis

The lysates were mixed with 5X sample buffer (50 mM Tris of pH 6.8, 2% SDS, 10% glycerol, 5%  $\beta$ -mercaptoethanol, and 0.1% bromophenol blue) and heated for 5 min at  $95^{\circ}\text{C}$ , followed by SDS-polyacrylamide gel electrophoresis (PAGE) using 8, 10, or 12% (w/v) polyacrylamide gel. After electrophoresis, samples were transferred to a polyvinylidene difluoride membrane (PVDF, Roche Diagnostics, Indianapolis, IN, USA) and then blocked for 1 h with TBS (Tris-buffered saline)-T buffer (10 mM Tris-HCl, 150 mM NaCl, and 0.1% Tween 20 containing 5% skim milk). The membrane was rinsed three times consecutively with TBS-T buffer, followed by incubation for 1 h with 1:1000 dilutions of primary monoclonal anti- $\beta$ -actin, anti-PPAR $\gamma$ , anti-AMPK $\alpha$ 1, anti-HSL, anti-AR, anti-ER $\alpha$ , anti-ER $\beta$ , anti-CYP19, anti-UCP1 (Santa Cruz Biotechnology, Santa Cruz, CA, USA), anti-FAS, and anti-CAV1 (Cell Signaling Technology, Beverly, MA, USA) antibodies in TBS-T buffer containing 1% skim milk. After three washes, the membrane was incubated for 1 h with horseradish peroxidase-conjugated anti-goat/rabbit/mouse IgG secondary antibody (1:1000, AB Frontier, Seoul, Korea) in TBS-T buffer containing 1% skim milk. Development was carried out using enhanced chemiluminescence (Westzol, iNtRON Biotechnology, Seongnam, Korea). Band intensities were normalized using  $\beta$ -actin bands in each tissue (Figure S2) and quantified using ImageMaster (GE Healthcare, Little Chalfont, Buckinghamshire, UK).

### Co-immunoprecipitation (CO-IP) and Protein Mass Fingerprinting (PMF)

Co-immunoprecipitation to identify CAV1-interacting proteins from abdominal WAT and BAT were performed using standard protocol as specified by the CO-IP kit manufacturer (Thermo Scientific, Waltham, MA, USA) and employing anti-CAV1 antibody (Cell Signaling). For the positive control sample, control rabbit IgG (Bethyl Laboratories Inc., Montgomery, TX, USA) was used. After CO-IP, all samples were separated by SDS-PAGE followed by silver staining. Lastly, to identify proteins by peptide mass fingerprinting, protein bands were excised, digested with trypsin (Promega, Madison, WI), mixed with  $\alpha$ -cyano-4-hydroxycinnamic acid in 50% acetonitrile/0.1% TFA, and subjected to MALDI-TOF analysis (Microflex LRF 20, Bruker Daltonics, Billerica, MA, USA). Peak list was generated using Flex Analysis 3.0 followed by protein identification using MASCOT, the Matixscience (<http://www.matrixscience.com>).

### Cell Culture and Differentiation

3T3-L1 and HIB1B preadipocytes were cultured and differentiated using a previously used protocol [44,45]. 3T3-L1 was purchased from Korean Cell line Bank (KCLB10092.1) and HIB1B cell line was a kind gift from Dr. Kwang-Hee Bae [46]. Sex hormone stocks were made with ethanol and later diluted using phosphate buffered saline (PBS) before treatment. During treatment, cells were maintained in maturation medium containing 0–20  $\mu\text{M}/\text{ml}$  of E2 (Sigma) or DHT (Sigma) or vehicle (PBS) for 6 days, and maturation medium was changed every 2 days.

### Immunofluorescence

3T3-L1 and HIB1B cells were cultured on sterilized coverslips placed in 6-well plates following the treatment protocol described in the cell culture section. After maturation for 6 days, the cells were washed with PBS and fixed with 10% formaldehyde. To measure the immunofluorescence of abdominal WAT and BAT, 4% *p*-formaldehyde-fixed and paraffin-embedded tissues were processed by standard protocol followed by antigen retrieval using 10 mM sodium citrate solution. Fixed adipocytes or tissue sections were washed with PBS-Tween 20 three times and blocked with 5% BSA for 1 h. Cells were then incubated with anti-CAV1 antibody (1:200 dilution) overnight in  $4^{\circ}\text{C}$ , washed three times with PBS-T, and incubated with FITC-conjugated secondary antibody for 1 h, after which the coverslip was mounted onto a slide with DAPI-containing mounting medium (Invitrogen, Carlsbad, CA, USA). Fluorescence images were taken by an Olympus IX51 inverted microscope (Olympus Co., Shinjuku, Tokyo, Japan). Abdominal adipocyte area and BAT lipid area were quantified using Image J software and compared within groups to check hormonal effect on adipocyte morphology.

### Oil Red O Staining and Quantification of Triglycerides (TG)

All cell types were matured for 6 days, washed with phosphate-buffered saline (PBS), fixed with 10% formalin for 1 h at room temperature, and washed three times with deionized water. A mixture of Oil Red O (0.6% Oil Red O dye in isopropanol) and water at a 6:4 ratio was layered onto the cells for 10 min, followed by washing three times with deionized water and photography. The matured cells were washed twice with PBS and harvested in order to prepare cell lysate using RIPA buffer (Sigma). TG content was measured according to the manufacturer's instructions using a TG test kit (Asan Pharm. Co., Yeongcheon, Korea). Absorbance was measured at 550 nm, and TG content was normalized to protein content as determined by the Bradford method [47].

### Quantitative Real-time RT-PCR

Total RNA was isolated using a total RNA isolation kit (RNA-spin, iNtRON Biotechnology, Seongnam, Korea) from each group of cells matured for 4–6 days in corresponding maturation medium, after which 1  $\mu\text{g}$  of RNA was converted to cDNA using Maxime RT premix (iNtRON Biotechnology). Transcript levels of genes were quantitatively determined by employing Power SYBR Green (GE Healthcare, Warrington, UK) with real-time RT-PCR (Stratagene 246 mx 3000p QPCR System, Agilent Technologies, Santa Clara, CA, USA). Transcript levels of each gene were normalized to the level of  $\beta$ -actin. Sequences of primer sets used in this study are listed in Table 1.

### Knockdown of Cav1

A commercially available siRNA transfection system (Santa Cruz Biotechnology), which is specific to *Cav1* (a pool of three

**Table 1.** Sequences of primers for real-time RT-PCR used in this study.

| Genes                           |                 | Primer sequence (5' - 3') |
|---------------------------------|-----------------|---------------------------|
| <i>Cav1</i>                     | F <sup>a)</sup> | ACCTCTCTGGACTGGCAGAA      |
|                                 | R <sup>b)</sup> | TCCCTGGAGGTTCACTCATC      |
| <i>Ppar<math>\gamma</math></i>  | F               | GGTGAAACTCTGGAGATTC       |
|                                 | R               | CAACCATTGGGTCAGCTCTT      |
| <i>C/ebp<math>\alpha</math></i> | F               | AGGTGCTGGAGTTGACCACT      |
|                                 | R               | CAGCCTAGAGATCCAGCGAC      |
| <i>Ppar<math>\alpha</math></i>  | F               | CCCCACCAGTACAGATGAGTC     |
|                                 | R               | GGAGTTTTGGGAAGAGAAAGG     |
| <i>Me1</i>                      | F               | AGAGCTCTCGTCCCAACA        |
|                                 | R               | TTGCTCAGAGGTGGGTTCC       |
| <i>Fasn</i>                     | F               | CCTTAGAGGCAGTGCAGGAC      |
|                                 | R               | TTGCTGCACTTCTTGACAC       |
| <i>Fabp4</i>                    | F               | CACCTGGAAGACAGCTCCTC      |
|                                 | R               | AATCCCATTACGCTGATG        |
| <i>Prkaa1</i>                   | F               | CAGGCCATAAAGTGCAGTTA      |
|                                 | R               | AAAAGTCTGTCGGAGTCTGA      |
| <i>6Pgd</i>                     | F               | TGAAGGGTCTAAGGTGGTCC      |
|                                 | R               | CCGCCATAATTGAGGGTCCAG     |
| <i>Srebp-1C</i>                 | F               | ACTGTCTTGTTGATGAGCTGGA    |
|                                 | R               | ATCGGCGCGGAAGCTGTCGGGGTAG |
| <i>Esr1</i>                     | F               | AAAGGGATTCCAGGCTAAA       |
|                                 | R               | CGCTTTGTCAACGACTTCAA      |
| <i>Esr2</i>                     | F               | GAAGCTGGCTGACAAGGAAC      |
|                                 | R               | AACGAGGTCTGGAGCAAAGA      |
| <i>Ar</i>                       | F               | GGACCATGTTTTACCCATCG      |
|                                 | R               | TCGTTTCTGCTGGCACATAG      |
| <b>Internal control</b>         |                 |                           |
| <i><math>\beta</math>-Actin</i> | F               | AGCCATGTACGTAGCCATCC      |
|                                 | R               | CTCTCAGCTGTGGTGGTAA       |

F<sup>a)</sup>, sequence from sense strands; R<sup>b)</sup>, sequence from anti-sense strands.  
doi:10.1371/journal.pone.0090918.t001

target-specific 20–25 nucleotide siRNAs designed to knockdown gene expression) was used for gene silencing in both 3T3-L1 and HIB1B cells. Post-confluent cells in 6-well culture dishes were washed twice with transfection medium and overlaid with a previously made mixture of siRNA and transfection reagent (Santa Cruz Biotechnology). The transfection process was carried out for 5–7 h depending on cell condition, after which cells were maintained in maturation medium for 6–8 days with regular medium changes every 2 days. Transfection efficiency was monitored by estimating the uptake of non-targeting fluorescein-labeled double-stranded RNA oligomers (BLOCK-iT, 150 nM per well, #2013, Invitrogen). Transcript levels of each gene were normalized to the level of  $\beta$ -actin. Finally, knockdown efficiency of transiently siRNA-expressing cells was determined as follows:

$$\% \text{ Knockdown} = (a - b) / b \times 100.$$

a: Normalized expression level of each gene in siRNA-transfected cells.

b: Normalized expression level of each gene in BLOCK-iT-transfected cells.

### Statistical Analysis

Statistical significance between control and hormone treated groups were compared using Student's *t*-test. Group means were considered significantly different at  $p < 0.05$ . The significance of the effects of sex, diet and hormonal treatments was tested using multivariate ANOVA (M-ANOVA). All of the statistical tests were performed using SPSS 17.0 software (Technologies, Chicago, IL, USA). The level of significance was set at  $p < 0.05$ .

### Results

#### E2 and DHT Oppositely Affect Body Weight Gain and Fat Mass in SD Rats

E2 and DHT treatments to 5-week-old SD rats for 48 days showed opposite effects on body weight gain in all groups regardless of sex or diet. E2-treated rats exhibited greatly reduced body weight gain during the entire time period starting from the 4<sup>th</sup> day in a time-dependent manner (Figure 1A). Conversely,

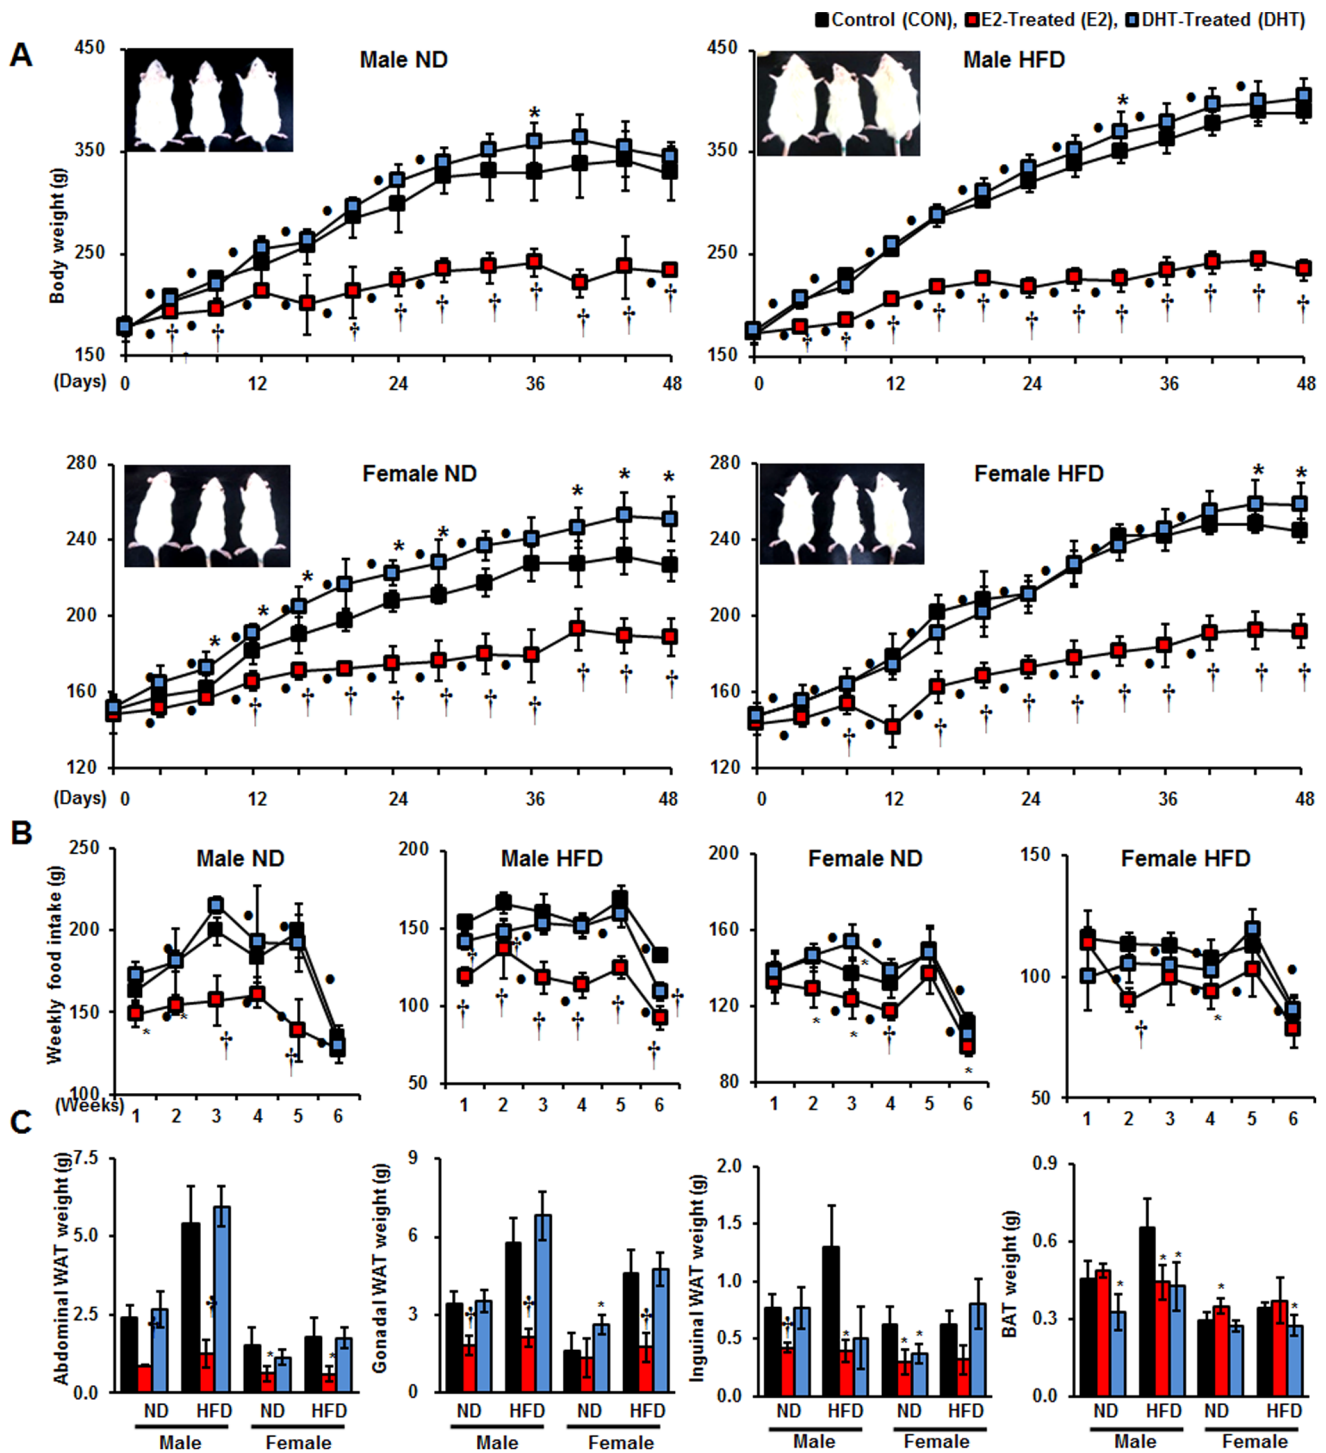

**Figure 1. Dietary and hormonal effects on time-dependent body weight gain with whole body images (inside panels: control, E2-treated, and DHT-treated rats from left) of each group (A), weekly food intake (B), and weights of different adipose tissue depots (C).** Statistical significance between control and hormone treated groups were calculated by Student's *t*-test, where, \* $p < 0.05$  and † $p < 0.01$ . Significances between time dependent body weight gain and weekly food intake were calculated using repeated measures multivariate ANOVA, where ● represents  $p < 0.05$ . doi:10.1371/journal.pone.0090918.g001

DHT showed stimulatory effects on body weight gain, although its effect was not as prominent as E2 in all groups (Figure 1A). The most significant body weight increase in response to DHT treatment was detected in the ND female group. Food consumption of each group was monitored weekly, as shown in Figure 1B.

E2 treatment led to a marked reduction of food intake in all groups, whereas DHT-treated rats showed no significant difference of food intake (Figure 1B). Finally, collected WAT showed significant attenuation of fat pad weight in E2-treated groups (Figure 1C). On the contrary, DHT-treated groups showed only

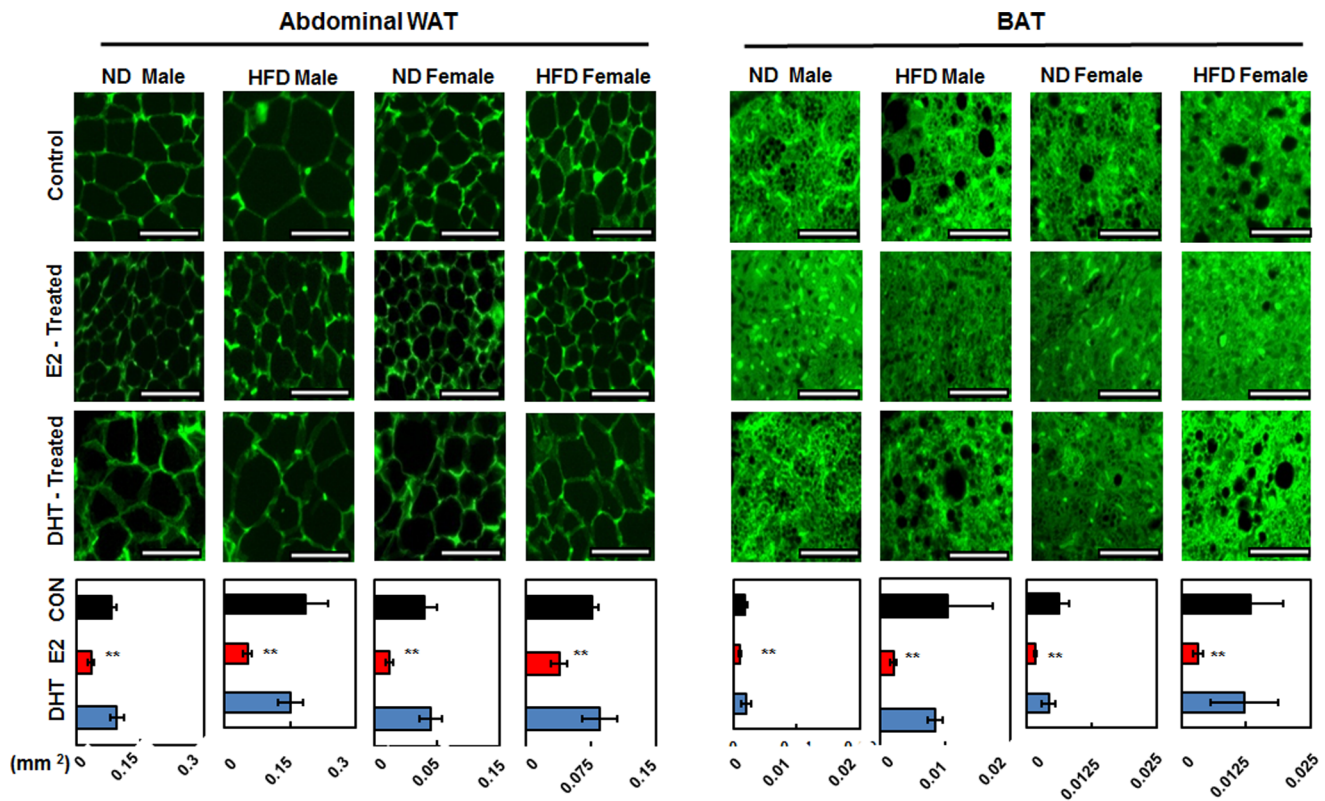

**Figure 2. Dietary and hormonal effects on morphologies of abdominal WAT and BAT using immunofluorescence of CAV1-FITC.** Scale bar represents 100  $\mu\text{m}$  and 50  $\mu\text{m}$ , respectively. Adipocyte area or lipid area between control and hormone treated groups were calculated by Student's *t*-test, where,  $*p < 0.05$  and  $**p < 0.01$ . The significance of the effects of sex, diet and hormonal treatments was tested using multivariate ANOVA (M-ANOVA), where  $p < 0.05$ . doi:10.1371/journal.pone.0090918.g002

slight differences from control counterparts. Interestingly, the effect was reversed for BAT, as E2 treatment elevated BAT fat pad weight especially in females while DHT reduced BAT weight in all groups, *albeit* not significantly (Figure 1C; Table S1). As abdominal WAT and BAT showed the most interesting fat pad weight patterns, we studied the histological characteristics of these tissues by immunofluorescence using CAV1-FITC followed by quantification of adipocyte area and lipid area in abdominal WAT and BAT, respectively. Expectedly, E2-treated abdominal WAT exhibited smaller adipocyte size than those of the other two groups (Figure 2; Table S2). BAT also showed a similar pattern with nearly invisible lipid droplets in E2-treated groups. We also found that plasma biochemical parameters reflected attenuation of TG in all E2-treated groups except female groups fed ND (Figure S1). In addition, plasma FFA levels significantly decreased in HFD-fed males but increased in HFD-fed females. In E2-treated groups, plasma E2 concentrations were significantly higher in all groups except HFD females. In contrast, plasma DHT levels showed no significant change in DHT-treated HFD rats, whereas DHT levels increased in E2-treated HFD rats (Figure S1).

### E2 and DHT Oppositely Regulate CAV1 in Different Adipose Tissue Depots

To elucidate the regulatory patterns of CAV1 after sex hormone treatment, we measured CAV1 expression in three different adipose tissue depots by immunoblot analysis. Interestingly, E2 treatment resulted in elevated levels of CAV1 in WAT of most groups (Figure 3). Most prominently, marked stimulation of CAV1

was observed in gonadal WAT of both sexes and diet groups (Figure 3). In contrast, CAV1 expression was not significantly reduced in either abdominal or gonadal WAT by DHT treatment, except in HFD-fed female groups (Figure 3). In BAT, E2 significantly stimulated CAV1 expression especially in females (Figure 3). To our surprise, abdominal WAT and BAT showed similar CAV1 expression levels with no significant difference in the HFD male group (Figure 3). Lastly, we measured CAV1 expression in two other major metabolic target tissues viz. the liver and soleus skeletal muscle (S muscle). E2 treatment caused significant reduction of CAV1 expression in the liver, especially in females (Figure 3). In contrast, DHT treatment did not have significant effects (Figure 3). Both E2 and DHT applied to S muscle had no marked effects on CAV1 expression, except in HFD-fed females, whereas DHT treatment significantly reduced CAV1 expression (Figure 3). Taken together, CAV1 was regulated in a tissue-specific manner with greater sex hormone dependence in adipose tissues and the liver (Figure 3).

### Sex Hormones Regulate Hormone Sensitive Lipase (HSL) in WAT and Uncoupling Protein 1 (UCP1) in BAT

In order to investigate the existence of sex dimorphism in lipolysis and thermogenesis in response to diet and sex hormone treatments, expression levels of HSL and UCP1 were determined in different WAT and BAT depots. As expected, E2 greatly stimulated HSL expression in WAT along with UCP1 expression in BAT in most groups, suggesting higher lipolytic and thermogenic capacity in E2-treated rats, as well as more prominent

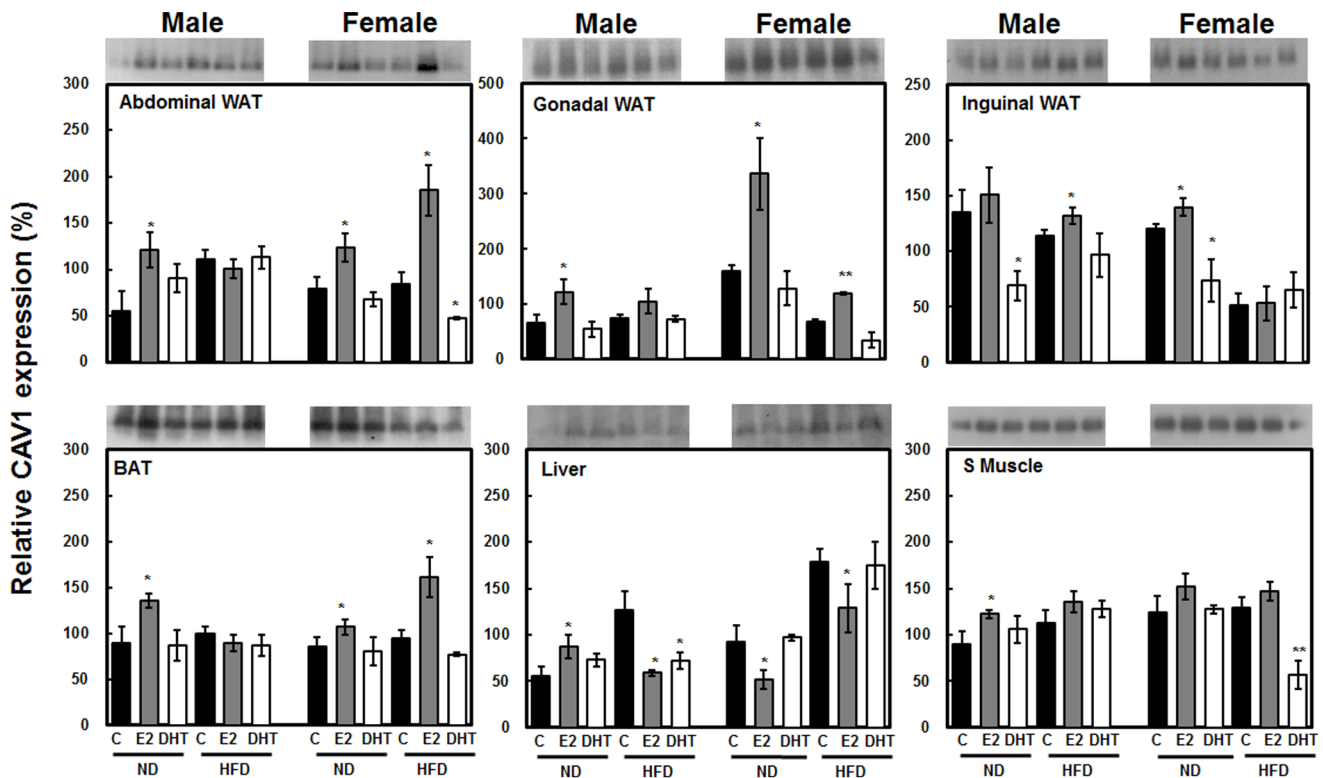

**Figure 3. CAV1 was differentially expressed in tissues upon treatments with high fat diet and sex steroid hormones (E2 and DHT) in a sex-dependent manner.** Band densities were normalized using  $\beta$ -actin in each tissue to calculate relative intensity (%). Statistical significance between control and hormone treated groups were calculated by Student's *t*-test, where, \* $p < 0.05$  and \*\* $p < 0.01$ . The significance of the effects of sex, diet and hormonal treatments was tested using multivariate ANOVA (M-ANOVA), where  $p < 0.05$ . doi:10.1371/journal.pone.0090918.g003

stimulation in female groups (Figure 4). On the contrary, DHT-treated females showed either unchanged or attenuated expression patterns of HSL and UCPI. Similar to the expression pattern of CAV1 in abdominal WAT and BAT, neither HSL nor UCPI were significantly altered in the HFD male group, which may explain why this group underwent the highest weight gain (Figure 4).

#### Differential Expression of Sex Hormone Receptors and Aromatase in Response to E2 and DHT Treatments

In order to examine whether or not sex hormone receptors and aromatase are important targets in the regulation of CAV1, we determined the levels of estrogen receptors (ER $\alpha$  and ER $\beta$ ), androgen receptor (AR), and aromatase (CYP19) in various WAT and BAT depots. After E2 treatment, ER $\alpha$  levels were significantly elevated in most adipose tissue depots, most significantly in gonadal WAT where ER $\alpha$  was stimulated in all groups (Figure 5). DHT treatment reduced expression of ER $\alpha$  only in abdominal WAT and BAT of HFD-fed groups (Figure 5). ER $\beta$  expression in abdominal WAT was also positively regulated in E2-treated groups with a more prominent effect in females (Figure 5). ER $\beta$  expression was stimulated in gonadal WAT and BAT of females but reduced in BAT and gonadal WAT of HFD-fed males (Figure 5). In inguinal WAT, ER $\beta$  expression showed no consistent pattern with higher expression in DHT-treated HFD groups (Figure 5). AR showed a differential expression pattern in inguinal WAT, gonadal WAT, and BAT, as it was significantly elevated in E2-treated groups as well as reduced in gonadal and inguinal WAT of DHT-treated ND male and HFD female groups

(Figure 5). Further, AR expression significantly increased only in abdominal WAT of ND male groups and decreased in HFD females (Figure 5). Finally, we observed that CYP19 expression was enhanced in abdominal and gonadal WAT by E2 treatment. On the other hand, DHT treatment had a significant effect only in HFD females displaying reduced CYP19 expression. A prominent increase in CYP19 expression was observed in BAT of all E2-treated groups except male HFD groups. Interestingly, DHT treatment attenuated expression of CYP19 in inguinal WAT, but the effect was only significant in ND male and HFD female groups.

#### CAV1 Interacts with Major Metabolic as well as Mitochondrial Proteins

To identify novel CAV1 partner proteins that may play roles in controlling the metabolic effects of sex hormones, we performed co-immunoprecipitation (Co-IP) of CAV1-associated proteins followed by SDS-PAGE and protein mass fingerprinting (PMF). Co-IP experiments were performed using abdominal WAT and BAT, as these two depots are considered to be the most important depots in sex-differential metabolic diseases. PMF data identified several major metabolic interacting proteins, as shown in Figure 6A. In abdominal WAT, we managed to identify two proteins viz. *N*-acetylmuramoyl-*L*-alanine amidase (AMIB) and carbonic anhydrase 3 (CAR3). In the case of BAT, we identified six interacting proteins, including aconitate hydratase, mitochondrial precursor (ACO2), ATP synthase (H<sup>+</sup> transporting, mitochondrial F1 complex, beta polypeptide, ATP5B), acetyl-CoA acyltransferase 2, mitochondrial (ACAA2), glyceroldehyde-3-

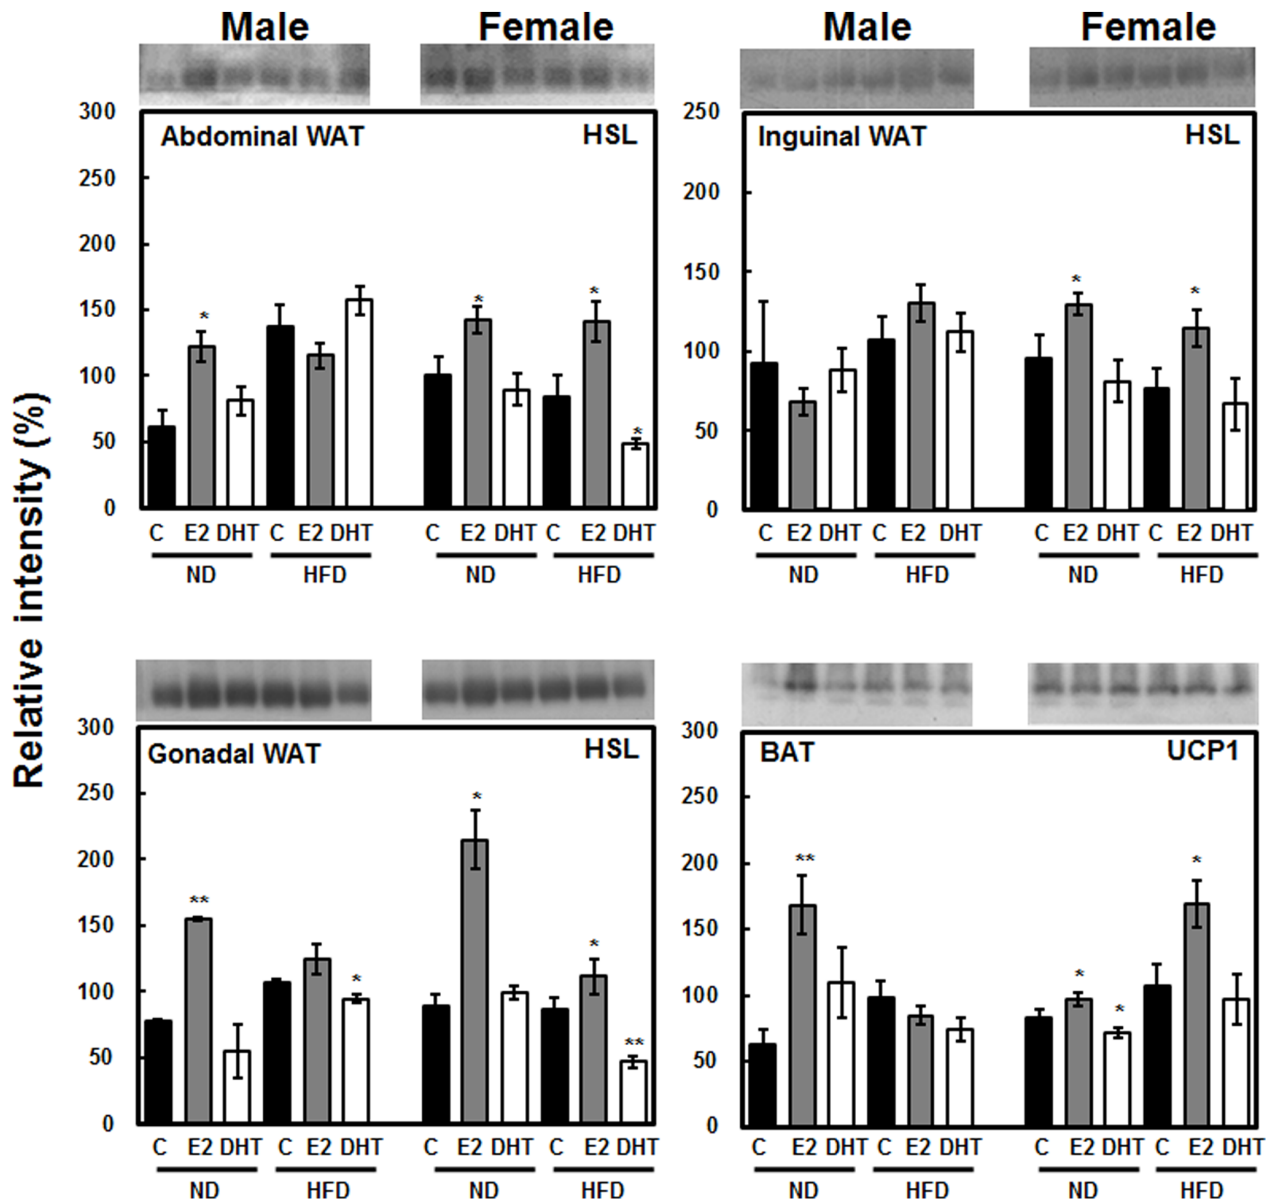

**Figure 4. Differential expression of hormone sensitive lipase (HSL) in WAT and uncoupling protein 1 (UCP1) in BAT before and after treatments with high fat diet and sex steroid hormones in both sexes.** Band densities were normalized using  $\beta$ -actin in each tissue to calculate relative intensity (%). Statistical significance between control and hormone treated groups were calculated by Student's *t*-test, where, \* $p < 0.05$  and \*\* $p < 0.01$ . The significance of the effects of sex, diet and hormonal treatments was tested using multivariate ANOVA (M-ANOVA), where  $p < 0.05$ .

doi:10.1371/journal.pone.0090918.g004

phosphate dehydrogenase (GAPDH), electron transfer flavoprotein, subunit beta (ETF), and triose phosphate isomerase 1 (TPI1) (Figure 6A). A majority of the identified proteins in BAT are mitochondrial proteins, with ATP5B and ETF being electron transport family members involved in energy expenditure. We reconfirmed the expression levels of ATP5B and ETF in all adipose tissue depots by immunoblot analysis. The two proteins were the most prominently regulated in BAT, and E2 treatment enhanced protein expression in all groups except HFD-fed males (Figure 6B). Most interestingly, this expression pattern was the same as that of CAV1, which indicates that ATP5B and ETF are highly associated with CAV1. Moreover, ETF showed the same expression pattern as CAV1 in abdominal WAT, whereas E2 treatment markedly affected the expression of ATP5B specifically

in ND-fed males and HFD-fed females (Figure 6B). In the case of gonadal WAT, E2 stimulated ETF expression in all groups, whereas ATP5B was stimulated only in ND groups of both sexes. Inguinal WAT showed no significant differences in expression between these two proteins, especially in HFD groups (Figure 6B).

#### E2 and DHT Oppositely Regulate CAV1 Expression in 3T3-L1 and HIB1B Adipocytes

To validate data obtained from *in vivo* experiments, we conducted a series of *in vitro* experiments using 3T3-L1 and HIB1B cell lines, which are widely used for biological research on adipose tissues (WAT and BAT, respectively). Caveolin 1 mRNA and protein expression levels significantly increased in a dose-



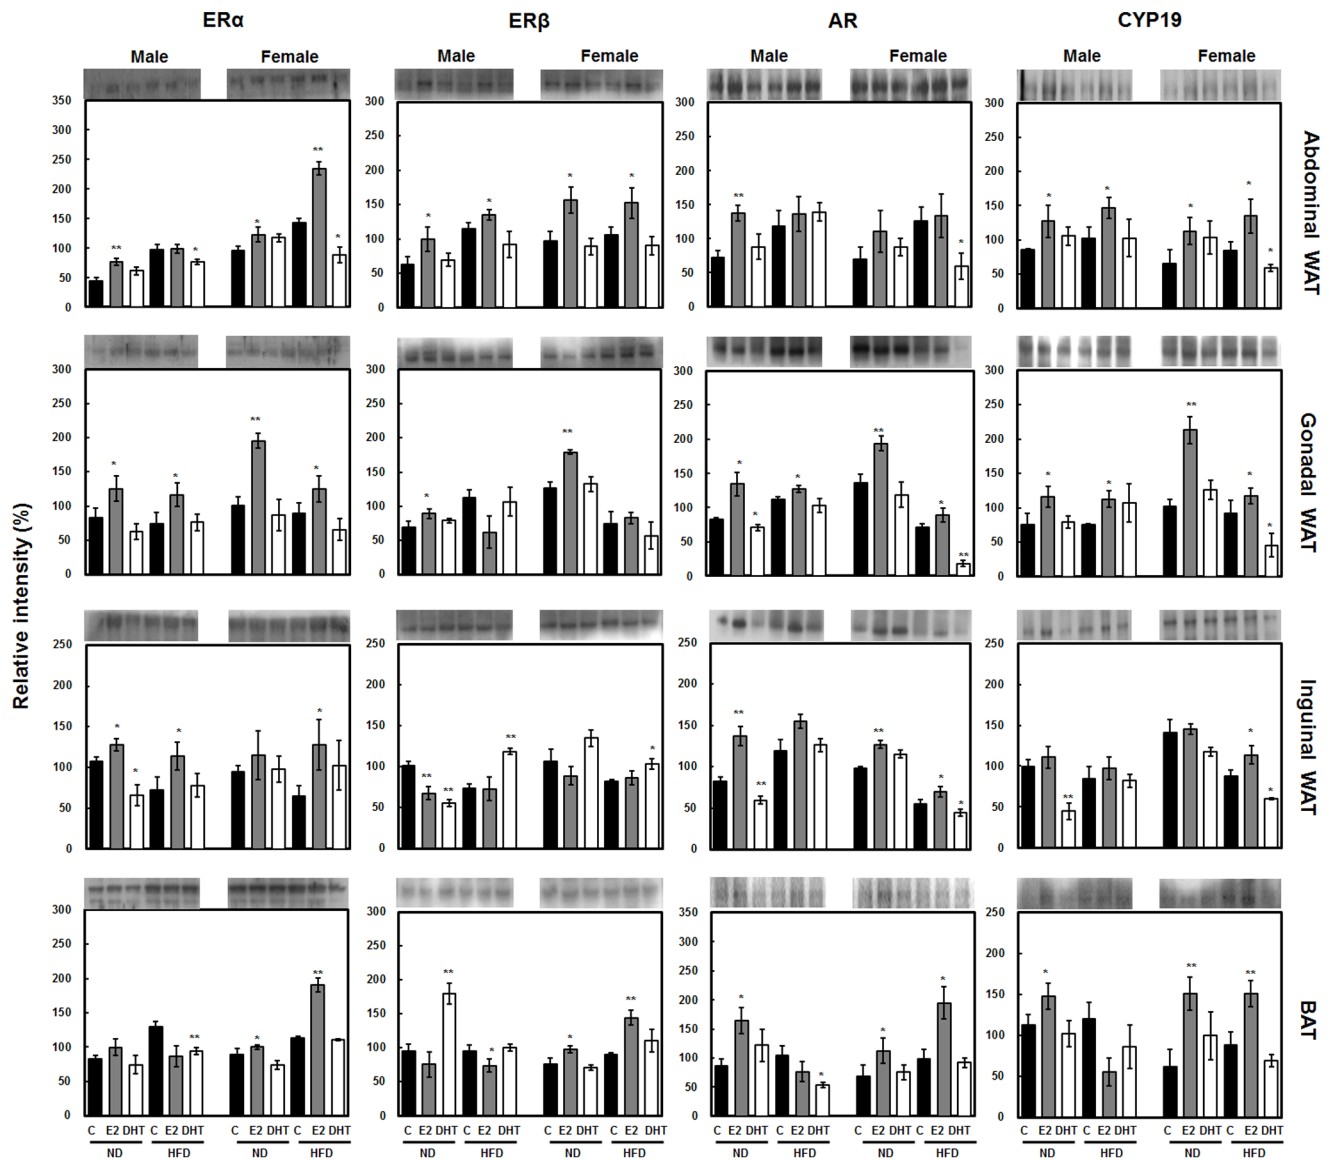

**Figure 5. Sex-dimorphic differential expression of estrogen receptors ( $ER\alpha$  and  $ER\beta$ ), androgen receptor (AR), and aromatase (CYP19) in different adipose tissue depots.** Band densities were normalized using  $\beta$ -actin in each tissue to calculate relative intensity (%). Statistical significance between control and hormone treated groups were calculated by Student's *t*-test, where, \* $p < 0.05$  and \*\* $p < 0.01$ . The significance of the effects of sex, diet and hormonal treatments was tested using multivariate ANOVA (M-ANOVA), where  $p < 0.05$ . doi:10.1371/journal.pone.0090918.g005

dependent manner after treatment with 0, 5, 10, 15, 20  $\mu$ M E2 (Figure 7A). Conversely, the same dose of DHT led to the dose-dependent reduction of *Cav1* mRNA expression (Figure 7A). This opposite expression pattern was also observed for CAV1 protein levels (Figure 7B). Since 10  $\mu$ M E2 or DHT was the lowest concentration showing significant effects on CAV1 expression, all subsequent experiments were carried out at this concentration. In the next step, CAV1 expression levels were evaluated in 3T3-L1 and HIB1B cells by immunofluorescence assay using anti-CAV1 antibody. E2-treated cells showed the highest fluorescence levels, confirming higher expression of CAV1, whereas DHT-treated cells showed diminished fluorescence compared to control cells (Figure 7C).

The effect of E2 or DHT treatment on oil droplet accumulation in 3T3-L1 and HIB1B cells was determined by Oil Red O staining. E2 treatment significantly reduced oil droplet accumu-

lation in both cell types, whereas DHT stimulated oil droplet accumulation (Figure 7D). This result suggests an inverse correlation compared to the CAV1 expression pattern, which led us to hypothesize CAV1 as an anti-adipogenic protein. This result also supports the aforementioned *in vivo* data in which CAV1 expression was positively affected by E2 and negatively affected by DHT, leading to reduced and increased body weight gain, respectively, in rats of both sexes regardless of diet (Figure 1A).

#### *Cav1* Knockdown (KD) Stimulates Lipogenesis but Suppresses Sex Hormone Receptors in 3T3-L1 and HIB1B Adipocytes

We efficiently knocked down the *Cav1* gene in both cells to demonstrate its effects on total adipogenic capacity and regulation

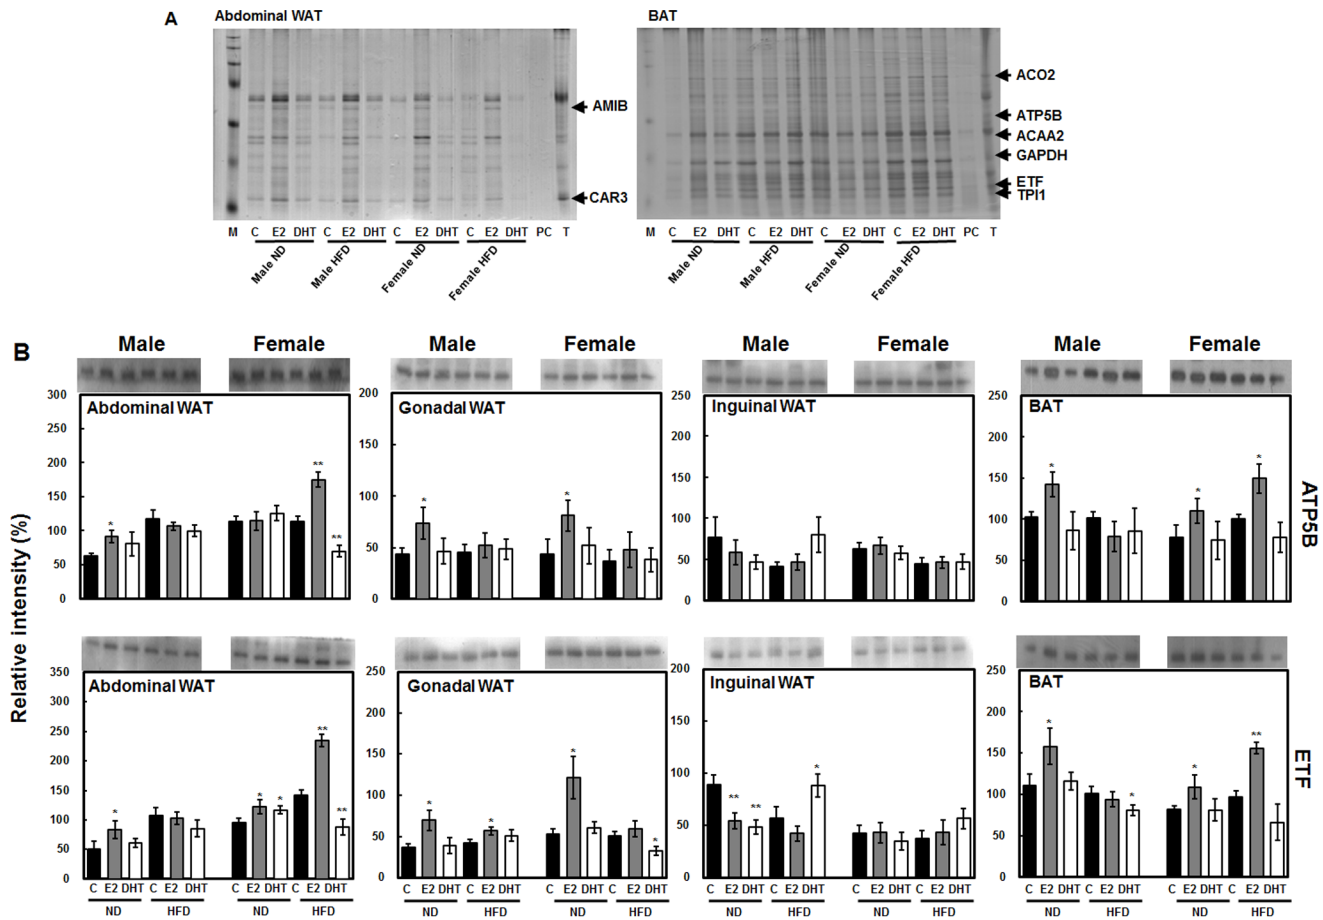

**Figure 6. Representative silver-stained SDS-PAGE images of co-immunoprecipitated samples of abdominal WAT and BAT (M: maker, C: control, E2: E2-treated, DHT: DHT-treated, PC: positive control, T: total protein).** Proteins were identified by PMF and indicated by black arrows along with their abbreviated names. AMIB: *N*-acetylmuramoyl-*L*-alanine amidase; CAR3: carbonic anhydrase 3; ACO2: aconitate hydratase, mitochondrial precursor; ATP5B: ATP synthase ( $H^+$  transporting, mitochondrial F1 complex, beta polypeptide); ACAA2: acetyl-CoA acyltransferase 2, mitochondrial; GAPDH: glycerol 3-phosphate dehydrogenase; ETF: electron transfer flavoprotein, subunit beta (ETF); TP11: triose phosphate isomerase 1 (A). Protein levels of two major mitochondrial proteins, ETF and ATP5B, were identified by PMF in abdominal WAT and BAT (B). Band densities were normalized using  $\beta$ -actin in each tissue to calculate relative intensity (%). Statistical significance between control and hormone treated groups were calculated by Student's *t*-test, where, \* $p < 0.05$  and \*\* $p < 0.01$ . The significance of the effects of sex, diet and hormonal treatments was tested using multivariate ANOVA (M-ANOVA), where  $p < 0.05$ . doi:10.1371/journal.pone.0090918.g006

of sex hormone receptors. Surprisingly, when *Cav1* was knocked down, expression levels of representative adipogenic and lipogenic marker genes (e.g. *6Pgd*, *Fabp4*, *Me1*, *Cebpa*, *Fasn*, *Prkaa1*, *Ppar $\alpha$* , *Ppar $\gamma$* , and *Srebp-1C*) significantly increased (Figure 8A). Protein levels of selected lipogenic proteins were also up-regulated in *Cav1* KD cells (Figure 8C). Furthermore, increases in oil droplet formation and TG concentration were observed in *Cav1* KD cells (Figures 8B, D). On the contrary, *Cav1* KD cells exhibited diminished mRNA and protein expression levels of estrogen and androgen receptors in both cells, reflecting the importance of *Cav1* in sex hormone-dependent regulation of adipocyte metabolism. Importantly, aromatase (CYP19) expression levels were oppositely regulated in 3T3-L1 and HIB1B adipocytes, indicating tissue-specific interconnection between CAV1 and CYP19 (Figure 8C). Additionally, our *in vitro* data showed that E2 and DHT treatments had opposite effects in 3T3-L1 and HIB1B adipocytes. These opposite effects were more prominent on ER $\alpha$  and AR expression, whereas ER $\beta$  and CYP19 were stimulated after E2 treatment only in 3T3-L1 cells. However, ER $\beta$  expression in HIB1B adipocytes showed attenuated expression upon DHT treatment (Figure 8E).

## Discussion

Based on our previous finding that CAV1 is highly expressed in adipose tissues in obesity-resistant rats fed a HFD [43], we wished to determine exactly which factors are involved in higher CAV1 expression for obesity resistance in HFD-fed rats as well as what different physiological programs exist between male and female rats. In this sense, we hypothesized that CAV1 may act as a potent molecular target for sex hormone-dependent regulation of adipocyte metabolism. The main goal of this study was to elucidate the interconnection between these two intensely studied networks in the context of WAT and BAT metabolism.

The present study demonstrated attenuated body weight gain, WAT weight, and food intake along with increased BAT weight in both E2-treated male and female rats. In contrast, DHT had the opposite effects, which is in line with previous reports in OVX/ORX rodents [22,48–51]. Smaller white adipocytes in WAT and fewer oil droplets in BAT of E2-treated groups were confirmed by CAV1-FITC immunofluorescence imagery, suggesting reduced lipogenic capacity. Additionally, attenuation of BAT weight in

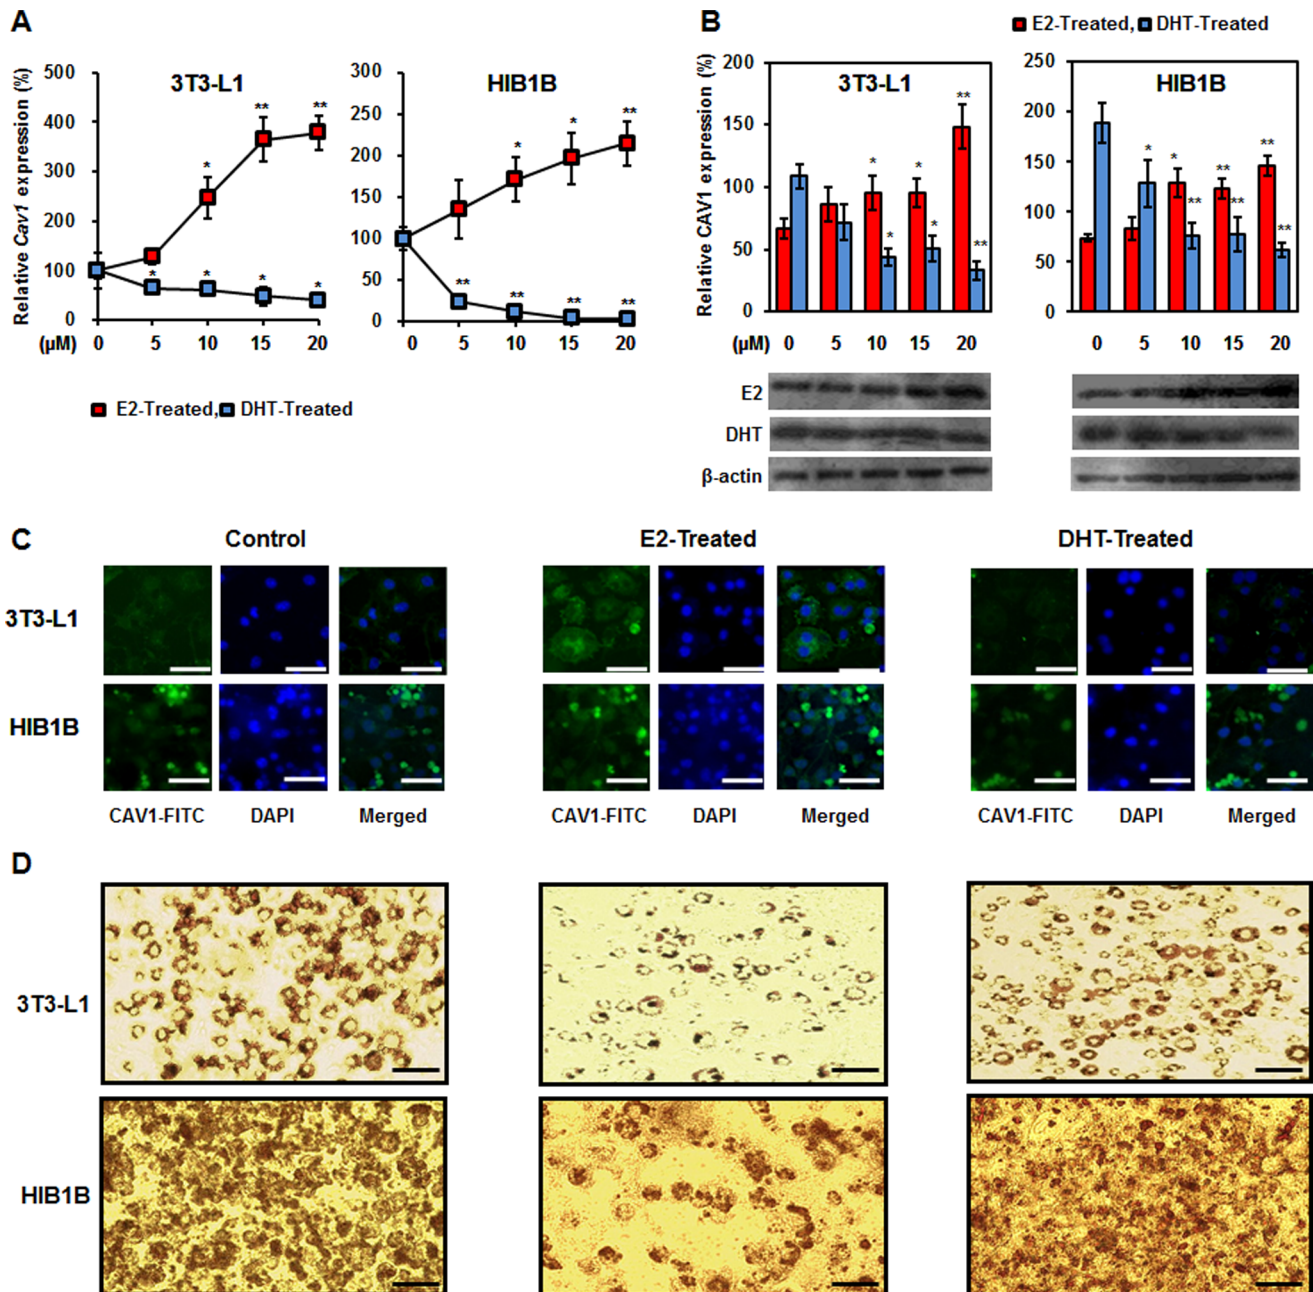

**Figure 7. Effects of sex hormone treatments on *Cav1* expression in 3T3-L1 and HIB1B adipocytes (A), CAV1 protein expression levels (B), CAV1 expression levels by immunocytochemistry (C), and fat accumulation as determined by Oil Red O staining (D).** Scale bar represents 50  $\mu\text{M}$  and 25  $\mu\text{M}$ , respectively. Statistical significance between different groups was calculated by Student's *t*-test, where  $*p < 0.05$  and  $**p < 0.01$ . doi:10.1371/journal.pone.0090918.g007

DHT-treated rats of both sexes may be connected with the reduced thermogenic capacity in these groups. This is the first report to confirm that exogenous sex hormones without OVX/ORX have opposite effects on body weight parameters in normal SD rats as compared to previous reports [35].

Previous reports have demonstrated the elevated expression of CAV1 after E2 treatment in vascular smooth muscle cells and aortic endothelial cells by transcriptional and translational stimulation [33,35,52]. We report here for the first time that CAV1 expression is stimulated by E2 and reduced by DHT in WAT and BAT, as depicted by our *in vivo* and *in vitro* experiments

as well as further supported by immunocytochemistry images of adipocytes. These results clearly demonstrate that CAV1 is a novel target protein in the hormonal regulation of adipocyte metabolism. In the current *in vitro* study, we have used supraphysiological concentration of sex hormones firstly to show hormonal regulation of CAV1 and secondly, to connect CAV1 expression levels with corresponding adipogenic capacity of these adipocytes based on the earlier reports [53–55], demonstrating beneficial effect of supraphysiological concentration of sex hormones on lipogenesis and lipid metabolism.

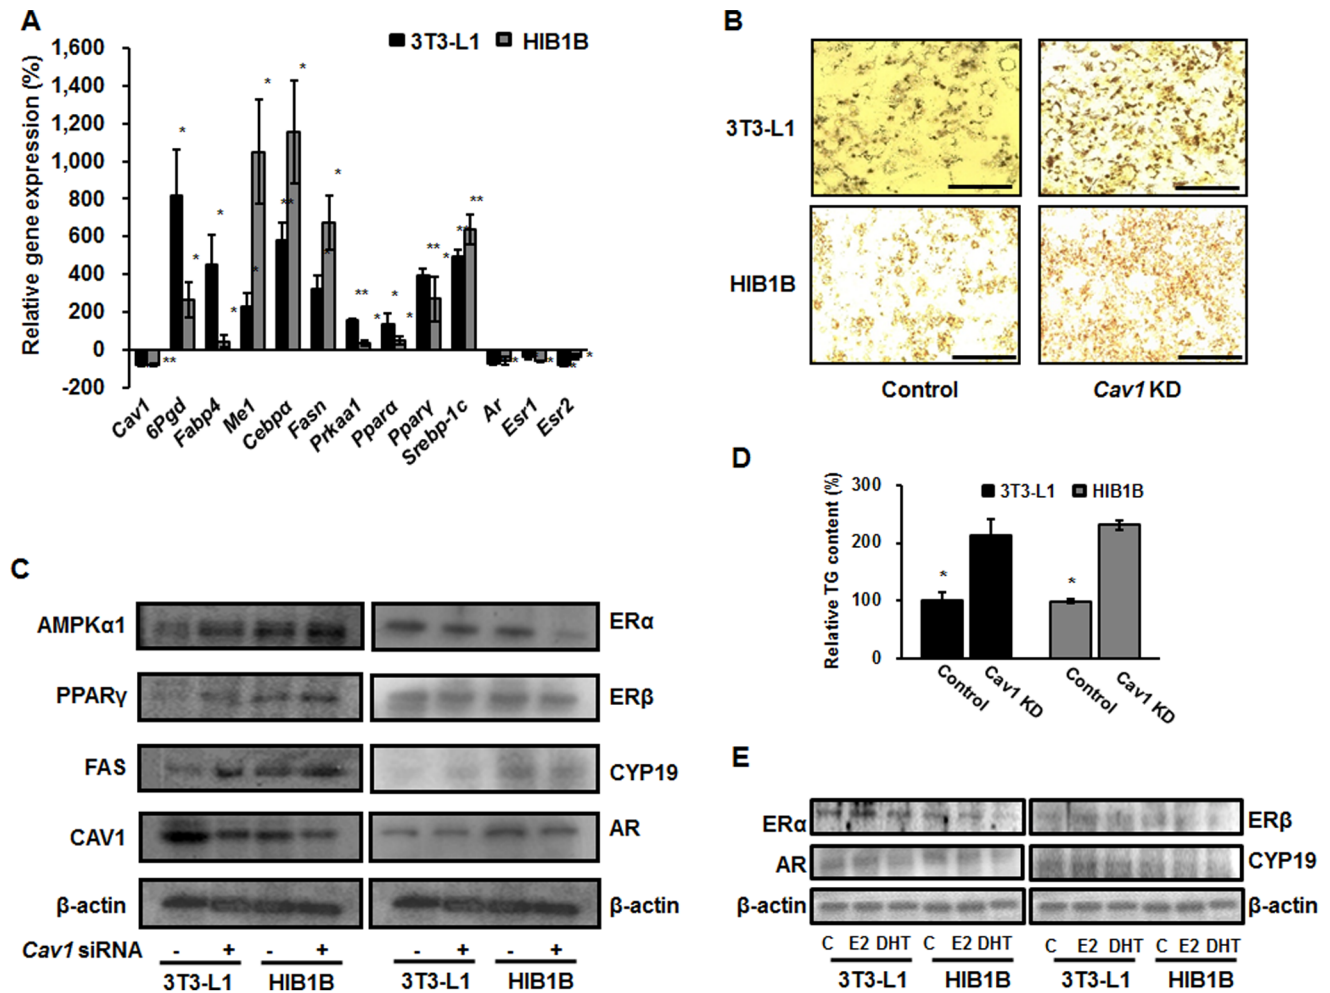

**Figure 8. Effect of *Cav1* knockdown (KD) on mRNA expression levels of major metabolic and sex hormone receptors in 3T3-L1 and HIB1B adipocytes (A), fat accumulation (B), protein expression levels of major metabolic and sex hormone receptors (C), triglyceride content (D), as well as protein expression levels of estrogen receptors, androgen receptor, and aromatase before and after sex hormone treatments (E).** Scale bar represents 50  $\mu$ M and 25  $\mu$ M, respectively. Statistical significance between different groups was calculated by Student's *t*-test, where \* $p$ <0.05 and \*\* $p$ <0.01. doi:10.1371/journal.pone.0090918.g008

We also observed that hormonal regulation of CAV1 is tissue-specific. In adipose tissues and S muscle, E2 showed stimulatory effects on CAV1 expression, whereas DHT had suppressive effects (Figure 3). However, the converse result was observed in the liver, demonstrating that the function of CAV1 varies in different tissues. This idea was first suggested by Cohen et al. [56], who reported that CAV1 is important for insulin signaling in adipose tissue but not in muscle or liver. In addition, Fernandez et al. [57] reported that CAV1 is positively correlated with lipogenesis in the liver. In the current study, E2-treated rats showed reduced lipogenesis associated with lower CAV1 expression (Figure 8). The role of CAV1 in the regulation of liver function is not yet clear. Reduced expression levels of CAV1 in livers of E2-treated male and female rats fed a HFD may indicate reduced lipid accumulation in the liver, as higher expression of CAV1 facilitates lipid storage and mobilization in adipose tissues.

It was previously reported that CAV1 expression in human adipose tissue is up-regulated in obesity and obesity-associated type 2 diabetes [58]. However, this finding is converse to a report by Fernandez-Real et al. [10], who observed a major decrease in CAV1 expression in visceral adipose tissue of obese patients. In

addition, as other studies have shown that insulin receptor expression and signaling is dependent on CAV1, increased expression of CAV1 in diabetic patients and mouse models may indicate an attempt to improve signaling under conditions of increased insulin resistance [58–60]. Meanwhile, CAV1 deficiency also leads to obesity accompanied by abnormalities in lipid metabolism, insulin resistance, hypertriglyceridemia, and dysregulated non-shivering thermogenesis [58].

Resistance to diet-induced obesity is one of the phenotypes of *Cav1*-null mice [17]. Obesity resistance in these mice can be attributed to the inability to convert TG in lipoprotein form to TG in lipid droplet form in WAT [17] in addition to the greater thermogenic capacity of BAT [61]. Any defect in the transport and/or storage of fatty acids or cholesterol in adipocytes of *Cav1*-null mice could lead to the alteration of lipid homeostasis, resulting in a lean body phenotype [61].

E2 has been proven to have stimulatory effects on HSL, resulting in increased basal lipolysis [62]. On the other hand, DHT has shown inhibitory effects on HSL in human subcutaneous WAT [63]. Similarly, these two sex hormones have opposite effects on UCPI expression [64,65]. To corroborate the previous

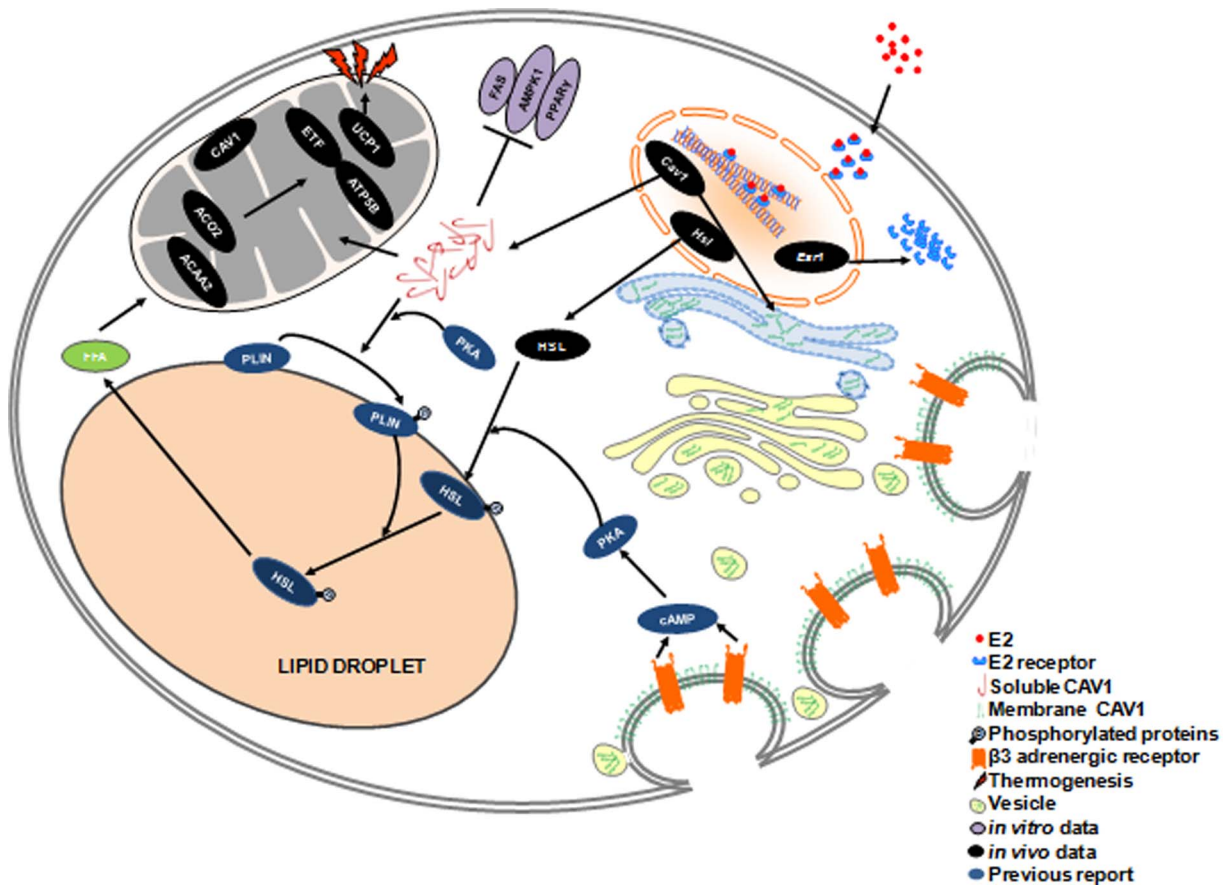

**Figure 9. Possible roles of CAV1 in E2-dependent regulation of adipocyte metabolism.**  
doi:10.1371/journal.pone.0090918.g009

results of other investigators, we examined sex-dependent HSL expression in response to treatment with sex hormones and HFD.

Importantly, expression levels of HSL and UCP1 were very similar with that of CAV1, especially in abdominal WAT and BAT, showing the same blunt regulation in HFD males (Figure 4). However, from the current data we are unable to conclude that E2 treatment in HFD-fed males has blunt effect on the expression levels of target proteins. But this similar expression patterns allowed us to hypothesize that CAV1 may have strong association with mitochondrial fatty acid oxidation and thermogenesis. To test this, we conducted Co-IP of CAV1-associated proteins and identified mitochondrial proteins in BAT, including ATP5B, ETF, ACAA2, and ACO2 (Figure 6). ATP5B and ETF are immensely important proteins in terms of energy expenditure, whereas ACAA2 and ACO2 are involved in fatty acid oxidation and the TCA cycle in mitochondria. Moreover, ACAA2 is a mitochondrial enzyme that catalyzes the last step of fatty acid oxidation, resulting in the release of acetyl CoA for the Krebs' cycle as well as other oxidative enzymes such as CPT1 [66]. ACO2 plays a role in converting citrate to isocitrate as well as fatty acid oxidation products to substrate for the Krebs' cycle, and it is reportedly down-regulated in HFD-induced obesity [67]. Furthermore, the immunoblot results for ATP5B and ETF demonstrated similar expression patterns as CAV1 mainly in abdominal WAT and BAT, suggesting concrete interactions among these proteins.

Recent reports demonstrated on the presence of soluble CAV1 in the cytoplasm and various other cellular compartments such as mitochondria [38,68], attenuation of metabolic flexibility due to

mitochondrial dysfunction in *Cav1* KO mice [7], and the positive role of E2 in mitochondrial biogenesis and signaling [69], supporting a novel connection between CAV1 and mitochondrial signaling. Here, our study showed that CAV1 interacts with major mitochondrial fatty acid oxidative and electron transport chain proteins. Additionally, similarity in the expression levels of CAV1, HSL, and UCP1 as well as novel mitochondrial partner proteins identified by Co-IP in E2-treated groups indicate a strong positive connection between CAV1 and the effects of E2 on mitochondrial function. These novel interactions between CAV1 and mitochondrial matrix proteins may function synergistically with inhibition of cholesterol accumulation at the mitochondrial membrane induced by CAV1 [70]. In this sense, the increased expression of both CAV1 and interacting mitochondrial proteins stimulated by E2 may cooperate with classical receptor-dependent stimulation of mitochondrial activity also induced by E2, resulting in sex hormone-dependent regulation of adipose tissue metabolism.

We further observed that BAT weight was reduced in DHT-treated groups, whereas it increased in all E2-treated groups except HFD-fed males. Interestingly, this regulatory pattern resembles the expression patterns of CAV1 and UCP1 in BAT. In addition, increased expression of UCP1 and CAV1 in BAT of E2-treated rats may reveal an essential connection between CAV1 and UCP1 for proper non-shivering thermogenesis *via* a modulatory effect on lipid mobilization [9,71].

Although previous studies have indicated that *Cav1* KO mice are resistant to HFD-induced obesity [4], there is a controversy concerning the role of CAV1 in lipogenesis [10]. However, there

are no reports on the effects of *Cav1* KD on the expression of major lipogenic genes or proteins in either 3T3-L1 or HIB1B adipocytes. In this regard, we report, for the first time, the up-regulation of major lipogenic and adipogenic genes as well as proteins in *Cav1* KD 3T3-L1 and HIB1B adipocytes (Figure 8).

It has been demonstrated that CAV1 directly interacts with both estrogen and androgen receptors [33,72]. In this context, our *in vitro* study observed attenuated expression of ER $\alpha$  and AR in both adipocyte cell types, whereas ER $\beta$  expression was ameliorated only in 3T3-L1 adipocytes. These expression patterns suggest an intense connection with sex hormone receptors, especially ER $\alpha$  and AR (Figure 8). Moreover, CYP19 showed opposite expression patterns between the two adipocytes. An earlier report demonstrated that aromatase expression increases during differentiation of 3T3-L1 adipocytes [73]. In this context, the present study showed that *Cav1* KD cells have higher differentiation and adipogenic capacity, resulting in stimulation of CYP19 in 3T3-L1 adipocytes but not HIB1B cells (Figure 8). Under the present circumstances, we are not able to interpret the opposite effects of *Cav1* KD on aromatase expression in 3T3-L1 and HIB1B adipocytes. Further studies are necessary to directly address this result.

ER $\alpha$  is regarded as the one of the main targets responsible for the anti-obesity effects of E2 based on its expression levels in human subcutaneous WAT [74] as well as the results of a study using E2 inhibitor [75]. The present study supports these results, as exogenous E2 led to increased expression of ER $\alpha$  for the stimulation of estrogenic signaling in normal SD rats. Schlegel et al. (1999) identified CAV1 as a potential regulator of ER $\alpha$  signal transduction by observing ligand-independent translocation of ER $\alpha$  into the nucleus upon co-expression of CAV1 and ER $\alpha$ . Conversely, the role of ER $\beta$  in the development of obesity remains controversial [75,76]. A recent report demonstrated that ER $\beta$  agonist treatment reduces adipogenic potential *via* negative crosstalk with PPAR $\gamma$  in female OVX Wistar rats [24]. In this study, abdominal WAT of E2-treated groups showed higher expression of ER $\beta$ , with females more prominently affected. However, in the case of BAT, stimulation of ER $\beta$  expression was observed only in females, which in turn may result in negative crosstalk of PPAR $\gamma$ -dependent lipogenic potential in these groups [21]. In case of BAT as well as gonadal and inguinal adipose tissues of male groups, ER $\beta$  failed to show any distinct pattern, suggesting a specific differential expression pattern for adipose tissues (Figure 5).

Androgen receptor (AR) is another important regulatory point of metabolism and body fat distribution. AR KO mice show late onset of obesity despite ameliorated lipolysis and UCPI expression [77]. However, a recent report demonstrated that adipose tissue-specific AR KO mice undergo significant body weight gain when fed a HFD [78]. In this regard, higher expression of AR in adipose tissues of E2-treated rats indicates a positive role for AR in body weight reduction in SD rats. On the contrary, DHT treatment previously led to reduce AR and HSL expression in subcutaneous adipose tissue [63]. We also found either no significant effect in most groups or reduced expression of AR especially in HFD-fed female groups of WAT. Taken together, reduced expression of AR along with reduced expression HSL by DHT treatment may have contributed negatively in body weight.

Earlier reports have demonstrated that aromatase (CYP19) KO mice as well as humans with polymorphisms in the *Cyp19* gene exhibit endocrine imbalance and obesity [79,80]. In addition, CYP19 in adipose tissue plays a pivotal role in circulating estrogen levels and fat distribution in males and postmenopausal females [76]. We propose that the opposite effects of E2 and DHT on

CYP19 protein expression levels in WAT and BAT are strongly connected with the maintenance of a steady E2 concentration through regulation of estrogen synthesis. This differential regulation of CYP19 may regulate the availability of sex hormones during adipose tissue metabolism.

Taken together, we describe the possible roles of CAV1 in E2-stimulated adipocytes conferring anti-obesity effects in Figure 9. The roles of DHT are not depicted as they were found to be the opposite in all metabolic events. E2 can effectively diffuse through the plasma membrane, subsequently binding with E2 receptors (ERs) in the cytosol. This results in transport of ERs into the nucleus, which increases the expression of *Cav1*, *Hsl*, and *Esr1*. Higher levels of ER $\alpha$  may be involved in the exponential stimulation E2-dependent signaling, whereas elevated HSL levels may indicate higher lipolytic capacity. Importantly, E2 highly stimulates two CAV1 pools using transcriptional and translational mechanisms. The first pool of CAV1 is transported to the plasma membrane through the endoplasmic reticulum and golgi bodies, whereas the second pool of CAV1 may directly transported to mitochondria from cytoplasm.

CAV1 in the plasma membrane is associated with  $\beta_3$ -adrenergic receptor-dependent lipolysis. *Cav1*-ablated mice show attenuated  $\beta_3$ -AR dependent lipolysis [71], and  $\beta_3$ -AR is oppositely regulated by treatment with E2 versus DHT [20]. Therefore, higher CAV1 expression and E2 activity act synergistically to stimulate  $\beta_3$ -AR signaling for the efficient phosphorylation of up-regulated HSL and peripilin (PLIN) by activated protein kinase A (PKA), thereby facilitating stimulated lipolysis [2]. CAV1 is known to be positively associated with phosphorylation of PLIN on lipid droplets [2]. In addition, Brasaemle et al. [81] reported the presence of CAV1 only in oil droplets of  $\beta_3$ -AR stimulated cells by proteomic analysis. In this sense, we propose that higher levels of cytoplasmic CAV1 may stimulate phosphorylation of PLIN to amplify lipolysis in association with elevated  $\beta_3$ -AR signaling induced by higher CAV1 levels in the plasma membrane.

Interestingly, our data suggest that CAV1 interacts with major mitochondrial proteins, which means a potent role for CAV1 in mitochondrial fatty acid oxidation and the electron transport chain resulting in elevated energy production. These elevated energy levels can be utilized by the higher amounts of UCPI induced by E2, resulting in higher non-shivering thermogenesis or energy dissipation through heat (Figure 9).

In conclusion, CAV1 play important roles in adipose accumulation and is an important target protein for the hormonal regulation of adipose tissue metabolism by manipulating sex hormone receptors and mitochondrial oxidative pathways. Here, we elucidated, for the first time, the molecular mechanism underlying the effects of sex steroid hormones on sex-dimorphic regulation of CAV1. Based on current data, we postulate that *Cav1* deficiency not only results in leanness found in *Cav1*-deficient rodents but also followed by impaired sex hormone-dependent metabolic regulations in adipose tissue, thereby leading to abnormalities in lipid metabolism, insulin resistance, hypertriglyceridemia, and dysregulated non-shivering thermogenesis.

## Supporting Information

**Figure S1 Effects of sex hormone treatment on plasma levels of triglycerides (TG), free fatty acids (FFA), estradiol (E2), and dihydrotestosterone (DHT).**  
(TIF)

**Figure S2 Corresponding control ( $\beta$ -actin) bands of each tissue that were used for normalization of western blot images.**

(TIF)

**Table S1 Statistical analysis of adipose tissue weight.** Adipose tissue weight between control and hormone treated groups were calculated by Student's *t*-test, where, \* $p < 0.05$ , \*\* $p < 0.01$ . The significance of the effects of sex, diet and sex\*diet were tested using multivariate ANOVA (M-ANOVA), where NS represents a  $p > 0.05$ . (DOCX)

**Table S2 Statistical analysis of adipocyte area (abdominal WAT) or lipid area (BAT) in Figure 2 of main manuscript.** Adipocyte area (abdominal WAT) or lipid area

(BAT) between control and hormone treated groups were calculated by Student's *t*-test, where, \*\* $p < 0.01$ . The significance of the effects of sex, diet and sex\*diet were tested using multivariate ANOVA (M-ANOVA), where NS represents a  $p > 0.05$ . (DOCX)

## Author Contributions

Conceived and designed the experiments: RM JWY. Performed the experiments: RM. Analyzed the data: RM SWK. Contributed reagents/materials/analysis tools: SWK. Wrote the paper: JWY MSC.

## References

- Hajer GR, van Haefen TW, Visseren FL (2008) Adipose tissue dysfunction in obesity, diabetes, and vascular diseases. *Eur Heart J* 29: 2959–2971.
- Cohen AW, Hnasko R, Schubert W, Lisanti MP (2004) Role of caveolae and caveolins in health and disease. *Physiol Rev* 84: 1341–1379.
- Campbell L, Gumbleton M, Ritchie K (2001) Caveolae and the caveolins in human disease. *Adv Drug Deliv Rev* 49: 325–335.
- Razani B, Lisanti MP (2001) Caveolin-deficient mice: insights into caveolar function human disease. *J Clin Invest* 108: 1553–1561.
- Schwencke C, Braun-Dullaeus RC, Wunderlich C, Strasser RH (2006) Caveolae and caveolin in transmembrane signaling: Implications for human disease. *Cardiovasc Res* 70: 42–49.
- Drab M, Verkade P, Elger M, Kasper M, Lohn M, et al. (2001) Loss of caveolae, vascular dysfunction, and pulmonary defects in caveolin-1 gene-disrupted mice. *Science* 293: 2449–2452.
- Asterholm IW, Mundy DI, Weng J, Anderson RG, Scherer PE (2012) Altered mitochondrial function and metabolic inflexibility associated with loss of caveolin-1. *Cell Metab* 15: 171–185.
- Briand N, Le Lay S, Sessa WC, Ferre P, Dugail I (2011) Distinct roles of endothelial and adipocyte caveolin-1 in macrophage infiltration and adipose tissue metabolic activity. *Diabetes* 60: 448–453.
- Cohen AW, Razani B, Schubert W, Williams TM, Wang XB, et al. (2004) Role of caveolin-1 in the modulation of lipolysis and lipid droplet formation. *Diabetes* 53: 1261–1270.
- Fernandez-Real JM, Catalan V, Moreno-Navarrete JM, Gomez-Ambrosi J, Ortega EJ, et al. (2010) Study of caveolin-1 gene expression in whole adipose tissue and its subfractions and during differentiation of human adipocytes. *Nutr Metab (Lond)* 7: 20.
- Le Lay S, Blouin CM, Hajdouch E, Dugail I (2009) Filling up adipocytes with lipids. Lessons from caveolin-1 deficiency. *Biochim Biophys Acta* 1791: 514–518.
- Razandi M, Oh P, Pedram A, Schnitzer J, Levin ER (2002) ERs associate with and regulate the production of caveolin: implications for signaling and cellular actions. *Mol Endocrinol* 16: 100–115.
- Wang X, Choi JW, Joo JI, Kim DH, Oh TS, et al. (2011) Differential expression of liver proteins between obesity-prone and obesity-resistant rats in response to a high-fat diet. *Br J Nutr* 106: 612–626.
- Joo JI, Yun JW (2011) Gene expression profiling of adipose tissues in obesity susceptible and resistant rats under a high fat diet. *Cell Physiol Biochem* 27: 327–340.
- Kim DH, Choi JW, Joo JI, Wang X, Choi DK, et al. (2011) Changes in expression of skeletal muscle proteins between obesity-prone and obesity-resistant rats induced by a high-fat diet. *J Proteome Res* 10: 1281–1292.
- Choi JW, Wang X, Joo JI, Kim DH, Oh TS, et al. (2010) Plasma proteome analysis in diet-induced obesity-prone and obesity-resistant rats. *Proteomics* 10: 4386–4400.
- Razani B, Combs TP, Wang XB, Frank PG, Park DS, et al. (2002) Caveolin-1-deficient mice are lean, resistant to diet-induced obesity, and show hypertriglyceridemia with adipocyte abnormalities. *J Biol Chem* 277: 8635–8647.
- Faulds MH, Zhao C, Dahlman-Wright K, Gustafsson JA (2012) The diversity of sex steroid action: regulation of metabolism by estrogen signaling. *J Endocrinol* 212: 3–12.
- Basu R, Dalla Man C, Campioni M, Basu A, Nair KS, et al. (2007) Effect of 2 years of testosterone replacement on insulin secretion, insulin action, glucose effectiveness, hepatic insulin clearance, and postprandial glucose turnover in elderly men. *Diabetes Care* 30: 1972–1978.
- Monjo M, Rodriguez AM, Palou A, Roca P (2003) Direct effects of testosterone, 17 beta-estradiol, and progesterone on adrenergic regulation in cultured brown adipocytes: potential mechanism for gender-dependent thermogenesis. *Endocrinology* 144: 4923–4930.
- Foryst-Ludwig A, Clemenz M, Hohmann S, Hartge M, Sprang C, et al. (2008) Metabolic actions of estrogen receptor beta (ERbeta) are mediated by a negative cross-talk with PPARgamma. *PLoS Genet* 4: e1000108.
- Moverare-Skrtic S, Venken K, Andersson N, Lindberg MK, Svensson J, et al. (2006) Dihydrotestosterone treatment results in obesity and altered lipid metabolism in orchidectomized mice. *Obesity (Silver Spring)* 14: 662–672.
- Quarta C, Mazza R, Pasquali R, Pagotto U (2012) Role of sex hormones in modulation of brown adipose tissue activity. *J Mol Endocrinol* 49: R1–7.
- Weigt C, Hertrampf T, Kluxen FM, Flenker U, Hulsemann F, et al. (2013) Molecular effects of ER alpha- and beta-selective agonists on regulation of energy homeostasis in obese female Wistar rats. *Mol Cell Endocrinol* 377: 147–158.
- Bryzgalova G, Lundholm L, Portwood N, Gustafsson JA, Khan A, et al. (2008) Mechanisms of antidiabetogenic and body weight-lowering effects of estrogen in high-fat diet-fed mice. *Am J Physiol Endocrinol Metab* 295: E904–912.
- Gao H, Bryzgalova G, Hedman E, Khan A, Efendic S, et al. (2006) Long-term administration of estradiol decreases expression of hepatic lipogenic genes and improves insulin sensitivity in ob/ob mice: a possible mechanism is through direct regulation of signal transducer and activator of transcription 3. *Mol Endocrinol* 20: 1287–1299.
- D'Eon TM, Souza SC, Aronovitz M, Obin MS, Fried SK, et al. (2005) Estrogen regulation of adiposity and fuel partitioning. Evidence of genomic and nongenomic regulation of lipogenic and oxidative pathways. *J Biol Chem* 280: 35983–35991.
- Mukherjee R, Choi JW, Choi DK, Oh TS, Liu H, et al. (2012) Gender-dependent protein expression in white adipose tissues of lean and obese rats fed a high fat diet. *Cell Physiol Biochem* 29: 617–634.
- Liu H, Choi JW, Yun JW (2012) Gender differences in rat plasma proteome in response to high-fat diet. *Proteomics* 12: 269–283.
- Oh TS, Choi JW, Choi DK, Mukherjee R, Liu H, et al. (2011) Gender dimorphism in skeletal muscle proteome between lean and diet-induced obese rats. *Cell Physiol Biochem* 28: 981–996.
- Choi DK, Oh TS, Choi JW, Mukherjee R, Wang X, et al. (2011) Gender difference in proteome of brown adipose tissues between male and female rats exposed to a high fat diet. *Cell Physiol Biochem* 28: 933–948.
- Wang X, Choi JW, Oh TS, Choi DK, Mukherjee R, et al. (2012) Comparative hepatic proteome analysis between lean and obese rats fed a high-fat diet reveals the existence of gender differences. *Proteomics* 12: 284–299.
- Lu ML, Schneider MC, Zheng Y, Zhang X, Richie JP (2001) Caveolin-1 interacts with androgen receptor. A positive modulator of androgen receptor mediated transactivation. *J Biol Chem* 276: 13442–13451.
- Nadal A, Diaz M, Valverde MA (2001) The estrogen trinity: membrane, cytosolic, and nuclear effects. *News Physiol Sci* 16: 251–255.
- Oh YS, Lee TS, Cheon GJ, Jang IS, Jun HS, et al. (2011) Modulation of insulin sensitivity and caveolin-1 expression by orchidectomy in a nonobese type 2 diabetes animal model. *Mol Med* 17: 4–11.
- Jedrzejuk D, Medras M, Milewicz A, Demissie M (2003) Dehydroepiandrosterone replacement in healthy men with age-related decline of DHEA-S: effects on fat distribution, insulin sensitivity and lipid metabolism. *Aging Male* 6: 151–156.
- Haring R, Volzke H, Felix SB, Schipf S, Dorr M, et al. (2009) Prediction of metabolic syndrome by low serum testosterone levels in men: results from the study of health in Pomerania. *Diabetes* 58: 2027–2031.
- Liu P, Rudick M, Anderson RG (2002) Multiple functions of caveolin-1. *J Biol Chem* 277: 41295–41298.
- Okamoto T, Schlegel A, Scherer PE, Lisanti MP (1998) Caveolins, a family of scaffolding proteins for organizing "preassembled signaling complexes" at the plasma membrane. *J Biol Chem* 273: 5419–5422.
- Sonnino S, Prinetti A (2009) Sphingolipids and membrane environments for caveolin. *FEBS Lett* 583: 597–606.
- Sud N, Wiseman DA, Black SM (2010) Caveolin 1 is required for the activation of endothelial nitric oxide synthase in response to 17beta-estradiol. *Mol Endocrinol* 24: 1637–1649.
- Mahmoudi M, Willgoss D, Cuttle L, Yang T, Pat B, et al. (2003) In vivo and in vitro models demonstrate a role for caveolin-1 in the pathogenesis of ischaemic acute renal failure. *J Pathol* 200: 396–405.
- Joo JI, Oh TS, Kim DH, Choi DK, Wang X, et al. (2011) Differential expression of adipose tissue proteins between obesity-susceptible and -resistant rats fed a high-fat diet. *Proteomics* 11: 1429–1448.

44. Mukherjee R, Yun JW (2013) Bromocriptine inhibits adipogenesis and lipogenesis by agonistic action on alpha2-adrenergic receptor in 3T3-L1 adipocyte cells. *Mol Biol Rep* 40: 3783–3792.
45. Karamanlidis G, Karamitri A, Docherty K, Hazlerigg DG, Lomax MA (2007) C/EBPbeta reprograms white 3T3-L1 preadipocytes to a Brown adipocyte pattern of gene expression. *J Biol Chem* 282: 24660–24669.
46. Choi HR, Kim WK, Kim EY, Jung H, Kim JH, et al. (2012) Protein tyrosine phosphatase profiling analysis of HIB-1B cells during brown adipogenesis. *J Microbiol Biotechnol* 22: 1029–1033.
47. Bradford MM (1976) A rapid and sensitive method for the quantitation of microgram quantities of protein utilizing the principle of protein-dye binding. *Anal Biochem* 72: 248–254.
48. Babaei P, Mehdizadeh R, Ansari MM, Damirchi A (2010) Effects of ovariectomy and estrogen replacement therapy on visceral adipose tissue and serum adiponectin levels in rats. *Menopause Int* 16: 100–104.
49. Mattiasson I, Rendell M, Tornquist C, Jeppsson S, Hulthen UL (2002) Effects of estrogen replacement therapy on abdominal fat compartments as related to glucose and lipid metabolism in early postmenopausal women. *Horm Metab Res* 34: 583–588.
50. Butera PC, Wojcik DM, Clough SJ (2010) Effects of estradiol on food intake and meal patterns for diets that differ in flavor and fat content. *Physiol Behav* 99: 142–145.
51. Kanaya N, Vonderfecht S, Chen S (2013) Androgen (dihydrotestosterone)-mediated regulation of food intake and obesity in female mice. *J Steroid Biochem Mol Biol* 138C: 100–106.
52. Jayachandran M, Hayashi T, Sumi D, Iguchi A, Miller VM (2001) Temporal effects of 17beta-estradiol on caveolin-1 mRNA and protein in bovine aortic endothelial cells. *Am J Physiol Heart Circ Physiol* 281: H1327–1333.
53. Jeong S, Yoon M (2011) 17beta-Estradiol inhibition of PPARgamma-induced adipogenesis and adipocyte-specific gene expression. *Acta Pharmacol Sin* 32: 230–238.
54. Fujioka K, Kajita K, Wu Z, Hanamoto T, Ikeda T, et al. (2012) Dehydroepiandrosterone reduces preadipocyte proliferation via androgen receptor. *Am J Physiol Endocrinol Metab* 302: E694–704.
55. Pirwany IR, Sattar N, Greer IA, Packard CJ, Fleming R (2002) Supraphysiological concentrations of estradiol in menopausal women given repeated implant therapy do not adversely affect lipid profiles. *Hum Reprod* 17: 825–829.
56. Cohen AW, Razani B, Wang XB, Combs TP, Williams TM, et al. (2003) Caveolin-1-deficient mice show insulin resistance and defective insulin receptor protein expression in adipose tissue. *Am J Physiol Cell Physiol* 285: C222–235.
57. Fernandez MA, Albor C, Ingelmo-Torres M, Nixon SJ, Ferguson C, et al. (2006) Caveolin-1 is essential for liver regeneration. *Science* 313: 1628–1632.
58. Catalan V, Gomez-Ambrosi J, Rodriguez A, Silva C, Rotellar F, et al. (2008) Expression of caveolin-1 in human adipose tissue is upregulated in obesity and obesity-associated type 2 diabetes mellitus and related to inflammation. *Clin Endocrinol (Oxf)* 68: 213–219.
59. Yamamoto M, Toya Y, Schwencke C, Lisanti MP, Myers MG, Jr., et al. (1998) Caveolin is an activator of insulin receptor signaling. *J Biol Chem* 273: 26962–26968.
60. Oh YS, Khil LY, Cho KA, Ryu SJ, Ha MK, et al. (2008) A potential role for skeletal muscle caveolin-1 as an insulin sensitivity modulator in ageing-dependent non-obese type 2 diabetes: studies in a new mouse model. *Diabetologia* 51: 1025–1034.
61. Cohen AW, Schubert W, Brasaemle DL, Scherer PE, Lisanti MP (2005) Caveolin-1 expression is essential for proper nonshivering thermogenesis in brown adipose tissue. *Diabetes* 54: 679–686.
62. Palin SL, McTernan PG, Anderson LA, Sturdee DW, Barnett AH, et al. (2003) 17Beta-estradiol and anti-estrogen ICI:compound 182,780 regulate expression of lipoprotein lipase and hormone-sensitive lipase in isolated subcutaneous abdominal adipocytes. *Metabolism* 52: 383–388.
63. Anderson LA, McTernan PG, Harte AL, Barnett AH, Kumar S (2002) The regulation of HSL and LPL expression by DHT and flutamide in human subcutaneous adipose tissue. *Diabetes Obes Metab* 4: 209–213.
64. Pedersen SB, Bruun JM, Kristensen K, Richelsen B (2001) Regulation of UCP1, UCP2, and UCP3 mRNA expression in brown adipose tissue, white adipose tissue, and skeletal muscle in rats by estrogen. *Biochem Biophys Res Commun* 288: 191–197.
65. Rodriguez AM, Monjo M, Roca P, Palou A (2002) Opposite actions of testosterone and progesterone on UCP1 mRNA expression in cultured brown adipocytes. *Cell Mol Life Sci* 59: 1714–1723.
66. Slocum N, Durrant JR, Bailey D, Yoon L, Jordan H, et al. (2013) Responses of brown adipose tissue to diet-induced obesity, exercise, dietary restriction and ephedrine treatment. *Exp Toxicol Pathol* 65: 549–557.
67. Relling DP, Esberg LB, Fang CX, Johnson WT, Murphy EJ, et al. (2006) High-fat diet-induced juvenile obesity leads to cardiomyocyte dysfunction and upregulation of Foxo3a transcription factor independent of lipotoxicity and apoptosis. *J Hypertens* 24: 549–561.
68. Li WP, Liu P, Pilcher BK, Anderson RG (2001) Cell-specific targeting of caveolin-1 to caveolae, secretory vesicles, cytoplasm or mitochondria. *J Cell Sci* 114: 1397–1408.
69. Oliveira PJ, Carvalho RA, Portincasa P, Bonfrate L, Sardao VA (2012) Fatty Acid Oxidation and Cardiovascular Risk during Menopause: A Mitochondrial Connection? *J Lipids* 2012: 365798.
70. Bosch M, Mari M, Herms A, Fernandez A, Fajardo A, et al. (2011) Caveolin-1 deficiency causes cholesterol-dependent mitochondrial dysfunction and apoptotic susceptibility. *Curr Biol* 21: 681–686.
71. Mattsson CL, Andersson ER, Nedergaard J (2010) Differential involvement of caveolin-1 in brown adipocyte signaling: impaired beta3-adrenergic, but unaffected LPA, PDGF and EGF receptor signaling. *Biochim Biophys Acta* 1803: 983–989.
72. Schlegel A, Wang C, Katzenellenbogen BS, Pestell RG, Lisanti MP (1999) Caveolin-1 potentiates estrogen receptor alpha (ERalpha) signaling: caveolin-1 drives ligand-independent nuclear translocation and activation of ERalpha. *J Biol Chem* 274: 33551–33556.
73. Yamada K, Harada N (1990) Expression of estrogen synthetase (P-450 aromatase) during adipose differentiation of 3T3-L1 cells. *Biochem Biophys Res Commun* 169: 531–536.
74. Dieudonne MN, Leneuve MC, Giudicelli Y, Pecquery R (2004) Evidence for functional estrogen receptors alpha and beta in human adipose cells: regional specificities and regulation by estrogens. *Am J Physiol Cell Physiol* 286: C655–661.
75. Heine PA, Taylor JA, Iwamoto GA, Lubahn DB, Cooke PS (2000) Increased adipose tissue in male and female estrogen receptor-alpha knockout mice. *Proc Natl Acad Sci U S A* 97: 12729–12734.
76. Kramarova TV, Dahlman Wright K, Pongratz I (2009) The role of the estrogen receptors in obesity. *Drug Discovery Today: Disease Mechanisms* 6: e49–e54.
77. Fan W, Yanase T, Nomura M, Okabe T, Goto K, et al. (2005) Androgen receptor null male mice develop late-onset obesity caused by decreased energy expenditure and lipolytic activity but show normal insulin sensitivity with high adiponectin secretion. *Diabetes* 54: 1000–1008.
78. McInnes KJ, Smith LB, Hunger NI, Saunders PT, Andrew R, et al. (2012) Deletion of the androgen receptor in adipose tissue in male mice elevates retinol binding protein 4 and reveals independent effects on visceral fat mass and on glucose homeostasis. *Diabetes* 61: 1072–1081.
79. Jones ME, Thorburn AW, Britt KL, Hewitt KN, Wreford NG, et al. (2000) Aromatase-deficient (ArKO) mice have a phenotype of increased adiposity. *Proc Natl Acad Sci U S A* 97: 12735–12740.
80. Baghaei F, Rosmond R, Westberg L, Hellstrand M, Eriksson E, et al. (2003) The CYP19 gene and associations with androgens and abdominal obesity in premenopausal women. *Obes Res* 11: 578–585.
81. Brasaemle DL, Dolios G, Shapiro L, Wang R (2004) Proteomic analysis of proteins associated with lipid droplets of basal and lipolytically stimulated 3T3-L1 adipocytes. *J Biol Chem* 279: 46835–46842.
